# Supplementary material for: Construction and application of an efficient dual-base editing platform for Bacillus subtilis evolution employing programmable base conversion
Source: PubMed Central journal article supplement — Chem Sci. 2022 Dec 1;13(48):14395–409. doi: 10.1039/d2sc05824c (PMC9749471; doi:10.1039/d2sc05824c), 2022-12-01
Supplement: SC-013-D2SC05824C-s001.pdf [file SC-013-D2SC05824C-s001.pdf]

## **Construction and application of an efficient dual-base editing platform for *Bacillus subtilis* evolution employing programmable base conversion**

Wenliang Hao<sup>#</sup>, Wenjing Cui<sup>#</sup>, Feiya Suo, Laichuang Han, Zhongyi Cheng\*, Zhemin Zhou\*

The Key Laboratory of Industrial Biotechnology (Ministry of Education), School of Biotechnology, Jiangnan University, 1800 Lihu Avenue, Wuxi 214122, China

### **Supplementary Information**

Table S1. The strains used in this study.

Table S2. The primers used for gene cloning in this study.

Table S3. The plasmids used in this study.

Table S4. The protospacer sequences used in this study.

Table S5. The mutations of PsdB.

Fig. S1. The base editing efficiency of the dual-base editor for the *bceB* gene and *pks* operon.

Fig. S2. Genome-wide off-target evaluation of dual-base editor.

Fig. S3. Sample image output of the sequencing data of the editing of *bceB* from the BEAT analysis.

Fig. S4. Base conversion efficiencies of the dual-base editor with an sgRNA array (B1-7) targeting *bceB* at different xylose concentration.

Fig. S5. Identification of genetic diversity for multiplex editing of *bceB* at different xylose concentrations.

Fig. S6. Identification and comparison of genetic diversification between multiplex editing and multiple rounds of single editing at the single-clone level.

Fig. S7. Identification of PsdB mutants by single-clone sequencing.

Supplementary method. The preparation of relevant medias.

Supplementary sequences. Sequence of key genetic parts.

**Table S1. The strains used in this study**

| <b>Strains</b>            | <b>Description</b>                                                                                                                                                                                                  | <b>References or sources</b> |
|---------------------------|---------------------------------------------------------------------------------------------------------------------------------------------------------------------------------------------------------------------|------------------------------|
| <i>E. coli</i><br>JM109   | <i>recA1, supE44 endA1 hsdR17</i> ( $\tau^{-}k, m^{+}k$ ) <i>gyrA96</i><br><br><i>relA1 thi (lac-proAB) F'</i> [ <i>traD36 proAB<sup>+</sup> lacI<sup>q</sup></i><br><br><i>lacZ</i> $\Delta$ M15]                  | Lab stock                    |
| <i>B. subtilis</i><br>168 | <i>trpC2</i>                                                                                                                                                                                                        | Lab stock                    |
| BS1                       | Derived from <i>B. subtilis</i> 168, <i>lacA::P<sub>xyIA</sub>-ABE7.10-</i><br><br><i>CDA-nCas9, Cm<sup>R</sup></i>                                                                                                 | This study                   |
| BS2                       | Derived from <i>B. subtilis</i> 168, <i>lacA::P<sub>xyIA</sub>-CDA-</i><br><br><i>ABE7.10-nCas9, Cm<sup>R</sup></i>                                                                                                 | This study                   |
| BS3                       | Derived from <i>B. subtilis</i> 168, <i>lacA::P<sub>xyIA</sub>-ABE7.10-</i><br><br><i>nCas9-CDA, Cm<sup>R</sup></i>                                                                                                 | This study                   |
| BS4                       | Derived from <i>B. subtilis</i> 168, <i>lacA::P<sub>xyIA</sub>-ABE8e-</i><br><br><i>CDA-nCas9, Cm<sup>R</sup></i>                                                                                                   | This study                   |
| BS5                       | Derived from <i>B. subtilis</i> 168, <i>lacA::P<sub>xyIA</sub>-CDA-</i><br><br><i>ABE8e-nCas9, Cm<sup>R</sup></i>                                                                                                   | This study                   |
| BS6                       | Derived from BS4, <i>amyE::P<sub>veg</sub>-B1/P<sub>veg</sub>-B2/P<sub>veg</sub>-</i><br><br><i>B3/P<sub>veg</sub>-B4/P<sub>veg</sub>-B5/P<sub>veg</sub>-B6/P<sub>veg</sub>-B7, Cm<sup>R</sup>, Spc<sup>R</sup></i> | This study                   |
| BS7                       | Derived from BS4, <i>amyE::P<sub>veg</sub>-B2/P<sub>veg</sub>-B3/P<sub>veg</sub>-B4,</i><br><br><i>Cm<sup>R</sup>, Spc<sup>R</sup></i>                                                                              | This study                   |
| BS8                       | Derived from BS4, <i>amyE::P<sub>veg</sub>-P1/P<sub>veg</sub>-P2/P<sub>veg</sub>-</i>                                                                                                                               | This study                   |

|             |                                                                                                                  |            |
|-------------|------------------------------------------------------------------------------------------------------------------|------------|
|             | P3/P <sub>veg</sub> -P4/P <sub>veg</sub> -P5, Cm <sup>R</sup> , Spc <sup>R</sup>                                 |            |
| BS9         | Derived from BS4, <i>amyE</i> ::P <sub>veg</sub> -P1/P <sub>veg</sub> -P5, Cm <sup>R</sup> ,<br>Spc <sup>R</sup> | This study |
| BS4-pJOE-B2 | Derived from BS4, harboring pJOE-B2 plasmid,<br>Kan <sup>R</sup> , Cm <sup>R</sup>                               | This study |
| BS4-pJOE-B3 | Derived from BS4, harboring pJOE-B3 plasmid,<br>Kan <sup>R</sup> , Cm <sup>R</sup>                               | This study |
| BS4-pJOE-B4 | Derived from BS4, harboring pJOE-B4 plasmid,<br>Kan <sup>R</sup> , Cm <sup>R</sup>                               | This study |

**Table S2. Primers used in this study**

| Primers     | Sequences (5'-3')                                     |
|-------------|-------------------------------------------------------|
| pHY-B1-F    | cgcaacaaacagttcattaagtttagagctagaaatagcaagttaaataag   |
| pHY-B1-R    | ttaatgaactgtttgtgcgttatattttacataatcgcgcg             |
| pHY-B2-F    | agccgctacattttgtcaggttttagagctagaaatagcaagttaaataag   |
| pHY-B2-R    | ctgaacaaaatgtagcggcttttatattttacataatcgcgcg           |
| pHY-B3-F    | tcaacattgcttgcaggacgttttagagctagaaatagcaagttaaataag   |
| pHY-B3-R    | gtcctgcaagcaaatgttgatttatattttacataatcgcgcg           |
| pHY-B4-F    | acagcaagctgcataattgccgttttagagctagaaatagcaagttaaataag |
| pHY-B4-R    | ggcaatatgcagcttgcgttttatattttacataatcgcgcg            |
| pHY-B5-F    | gccccgcttgtaaactgtgttttagagctagaaatagcaagttaaataag    |
| pHY-B5-R    | acacgtttacaagcggggcttttatattttacataatcgcgcg           |
| pHY-B6-F    | caccattgtttaaataagtttagagctagaaatagcaagttaaataag      |
| pHY-B6-R    | ttatttaaacaatgggtgttttatattttacataatcgcgcg            |
| pHY-B7-F    | aacaccatcaccataatcatgttttagagctagaaatagcaagttaaataag  |
| pHY-B7-R    | atgattatggtgatgggtgttttatattttacataatcgcgcg           |
| pHY-pksA1-F | atcagccagaaatattgcaagtttagagctagaaatagcaagttaaataag   |
| pHY-pksA1-R | ttgcaatatttctggctgatttttatattttacataatcgcgcg          |
| pHY-pksA2-F | cacgcgcacagggtcaagcagtttagagctagaaatagcaagttaaataag   |
| pHY-pksA2-R | tgcttgaccctgtgcgctgttttatattttacataatcgcgcg           |
| pHY-pksB-F  | cattcaaagaataaagtcgggttttagagctagaaatagcaagttaaataag  |
| pHY-pksB-R  | ccgactttattcttgaatgttttatattttacataatcgcgcg           |
| pHY-pksC-F  | tcacgcataaagaagatggttttagagctagaaatagcaagttaaataag    |

|                       |                                                      |
|-----------------------|------------------------------------------------------|
| pHY-pksC-R            | catctttctttatgcatgatttatattttacataatcgcgcg           |
| pHY-pksD1-F           | gttccaatactatcacatggttttagagctagaaatagcaagttaaataag  |
| pHY-pksD1-R           | catgtgatagtattgggaactttatattttacataatcgcgcg          |
| pHY-pksD2-F           | actcaatcataaaaatggcggtttagagctagaaatagcaagttaaataag  |
| pHY-pksD2-R           | cgccattttatgattgagttttatattttacataatcgcgcg           |
| pHY-pksE1-F           | acacaaatcgtcgccatgtttagagctagaaatagcaagttaaataag     |
| pHY-pksE1-R           | atggctgacgatattgtgtttatattttacataatcgcgcg            |
| pHY-pksE2-F           | tcccggcgagacattgagagtttagagctagaaatagcaagttaaataag   |
| pHY-pksE2-R           | tctcaatgctgccgggatttatattttacataatcgcgcg             |
| pHY-pksF-F            | cacgggattagcatatacgggtttagagctagaaatagcaagttaaataag  |
| pHY-pksF-R            | ccgtatgctaatcccgtttatattttacataatcgcgcg              |
| pHY-pksG-F            | gcaccggacaatgatgctgtagtttagagctagaaatagcaagttaaataag |
| pHY-pksG-R            | tacgcatcattgtccggtgctttatattttacataatcgcgcg          |
| ABE7.10-CDA-nCas9-b-F | tggaggaagcacagatgccgaatacgttcg                       |
| ABE7.10-CDA-nCas9-b-R | aacttcgctcatggatcccatttcccccttgatttta                |
| TadA1-F               | ggaaatgggatccatgagcgaagtgaattcagcc                   |
| TadA1-R               | cggcatctgtgcttccatccagatgagcctc                      |
| ABE8e-CDA-nCas9-b-F   | tggaggaagcacagatgccgaatacgttcg                       |
| ABE8e-CDA-nCas9-b-R   | cttctgacatggatcccatttcccccttgatttta                  |
| ABE8e1-F              | aatgggatccatgtcagaagtgaatttcacatg                    |
| ABE8e1-R              | cggcatctgtgcttccatccagatgagcctc                      |
| CDA-ABE7.10-nCas9-b-F | tctggaggaagcagataagaataactcaataggcttagctatcg         |
| CDA-ABE7.10-nCas9-b-R | caacttcgctagactctggagttgcagactc                      |
| TadA2-F               | tccagagtctagcgaagtgaattcagccac                       |
| TadA2-R               | gagtatttcttctgcttccatccagatgagcctc                   |
| CDA-ABE8e-nCas9-b-F   | atcactcacacgcataaagtgttttagagctagaaatagcaagttaaataag |
| CDA-ABE8e-nCas9-b-R   | actttatgcgtgtgagtgattttatattttacataatcgcgcg          |
| ABE8e2-F              | cctgcaggattcacttcaagtttagagctagaaatagcaagttaaataag   |
| ABE8e2-R              | ttgaaagtgaatcctgcaggtttatattttacataatcgcgcg          |
| ABE7.10-nCas9-CDA-b-F | tctggaggaagcagataagaataactcaataggcttagctatcg         |
| ABE7.10-nCas9-CDA-b-R | aacttcgctcatggatcccatttcccccttgatttta                |
| TadA3-F               | ggaaatgggatccatgagcgaagtgaattcagcc                   |
| TadA3-R               | gagtatttcttctgcttccatccagatgagcctc                   |

|             |                                                       |
|-------------|-------------------------------------------------------|
| bceB-B1-F   | cgcaacaacagttcattaagtttagagctagaaatagcaagttaaataag    |
| bceB-B1-R   | ttaatgaactgtttgtgcgacattattgtacaacacgagcc             |
| bceB-B2-F   | agccgctacattttgtcaggttttagagctagaaatagcaagttaaataag   |
| bceB-B2-R   | ctgaacaaaatgtagcggctacattattgtacaacacgagcc            |
| bceB-B3-F   | tcaacatttgcttgaggacgttttagagctagaaatagcaagttaaataag   |
| bceB-B3-R   | gtcctgcaagcaaatgtgaacattattgtacaacacgagcc             |
| bceB-B4-F   | acagcaagctgcataattgccgttttagagctagaaatagcaagttaaataag |
| bceB-B4-R   | ggcaatatgcagcttgcgtacattattgtacaacacgagcc             |
| bceB-B5-F   | gccccgcttgaacgtgtgttttagagctagaaatagcaagttaaataag     |
| bceB-B5-R   | acacgttfacaagcgggggcacattattgtacaacacgagcc            |
| bceB-B6-F   | caccattgtttaaaataagtttagagctagaaatagcaagttaaataag     |
| bceB-B6-R   | ttatttaaacaaaatgggtgacattattgtacaacacgagcc            |
| bceB-B7-F   | aacaccatcaccataatcatgttttagagctagaaatagcaagttaaataag  |
| bceB-B7-R   | atgattatgggtgatgggttacattattgtacaacacgagcc            |
| psdB-P1-F   | aaacacacagcttaaaaagtgttttagagctagaaatagcaagttaaataag  |
| psdB-P1-R   | acttttaagctgtgtgttacattattgtacaacacgagcc              |
| psdB-P2-F   | cgctcaagcatgtttgacagtttagagctagaaatagcaagttaaataag    |
| psdB-P2-R   | tgtcaaacatgcttgagcgacattattgtacaacacgagcc             |
| psdB-P3-F   | taacaggcctgctcaatgcgttttagagctagaaatagcaagttaaataag   |
| psdB-P3-R   | gcattggagcaggcctgttaacattattgtacaacacgagcc            |
| psdB-P4-F   | ctgaaacaggatgagaaagcgttttagagctagaaatagcaagttaaataag  |
| psdB-P4-R   | gctttctcatcctgtttcagacattattgtacaacacgagcc            |
| psdB-P5-F   | attaacactaaaatcaaatgttttagagctagaaatagcaagttaaataag   |
| psdB-P5-R   | atfttgatttagttaaatacattattgtacaacacgagcc              |
| B1-Go-F     | ggtctcaatgcttattaacgttgatataatttaaattttattgacaaaaatgg |
| B1-Go-R     | ggtctcgaagtaaaaaagcaccgactcgg                         |
| B2-Go-F     | ggtctcatcattattaacgttgatataatttaaattttattgacaaaaatgg  |
| B2-Go-R     | ggtctcgacaaaaaaagcaccgactcgg                          |
| B3-Go-F     | ggtctcaggtgttattaacgttgatataatttaaattttattgacaaaaatgg |
| B3-Go-R     | ggtctcgatggaaaaaaagcaccgactcgg                        |
| B4-Go-F     | ggtctcaccattattaacgttgatataatttaaattttattgacaaaaatgg  |
| B4-Go-R     | ggtctcgagccaaaaaaagcaccgactcgg                        |
| B5-Go-F     | ggtctcaacttttattaacgttgatataatttaaattttattgacaaaaatgg |
| B5-Go-R     | ggtctcggctaaaaaaagcaccgactcgg                         |
| B6-Go-F     | ggtctcaggcttattaacgttgatataatttaaattttattgacaaaaatgg  |
| B6-Go-R     | ggtctcggcataaaaaaaagcaccgactcgg                       |
| B7-Go-F     | ggtctcatagcttattaacgttgatataatttaaattttattgacaaaaatgg |
| B7-Go-R     | ggtctcgaagcaaaaaaaagcaccgactcgg                       |
| bceB-Go-b-F | ggtctcagcttaagcttgggcttaattaattaagactc                |
| bceB-Go-b-R | ggtctcttgaggatcccgtcgacgc                             |
| P1-Go-F     | ggtctcatcattattaacgttgatataatttaaattttattgacaaaaatgg  |
| P1-Go-R     | ggtctcgacaaaaaaagcaccgactcgg                          |
| P2-Go-F     | ggtctcaggtgttattaacgttgatataatttaaattttattgacaaaaatgg |

|             |                                                       |
|-------------|-------------------------------------------------------|
| P2-Go-R     | ggctcgcgatggaaaaagcaccgactcgg                         |
| P3-Go-F     | ggctccaccatttataacggtgatataatttaaattttattgacaaaaatgg  |
| P3-Go-R     | ggctcgagccaaaaagcaccgactcgg                           |
| P4-Go-F     | ggctcaggccttattaacggtgatataatttaaattttattgacaaaaatgg  |
| P4-Go-R     | ggctcggcataaaaaagcaccgactcgg                          |
| P5-Go-F     | ggctcgaatgcttattaacggtgatataatttaaattttattgacaaaaatgg |
| P5-Go-R     | ggctcgaagcaaaaaagcaccgactcgg                          |
| psdB-Go-b-F | ggctcagcttaagcttgggcttaattaattaagactc                 |
| psdB-Go-b-R | ggctcctggaggatcccgtcgacgc                             |
| pJOE-F      | atgcgaattcttattaacggtgatataatttaaattttattgacaaaaatgg  |
| pJOE-R      | attataaaaaaaaaagcaccgactcgg                           |
| pJOE-b-F    | gtgctttttttaataatccaaatgagataaaaatgcatgacattg         |
| pJOE-b-R    | acgtaataagaattcgcatcacacgcaaaaag                      |

**Table S3. The plasmids used in this study**

| Plasmids     | Description                                                                                   | References or sources        |
|--------------|-----------------------------------------------------------------------------------------------|------------------------------|
| pHYT-P43-G10 | <i>E. coli-B. subtilis</i> shuttle vector, P43 promoter, gRNA targeting GFP, Tet <sup>R</sup> | Lu et al., 2019 <sup>1</sup> |
| pHY-ECBE     | Derived from pHYT-P43-G10, gRNA targeting <i>sigE</i>                                         | Lab stock                    |
| pHY-B1       | Derived from pHYT-P43-G10, gRNA targeting <i>bceB</i> (B1)                                    | This study                   |
| pHY-B2       | Derived from pHYT-P43-G10, gRNA targeting <i>bceB</i> (B2)                                    | This study                   |
| pHY-B3       | Derived from pHYT-P43-G10, gRNA targeting <i>bceB</i> (B3)                                    | This study                   |
| pHY-B4       | Derived from pHYT-P43-G10, gRNA targeting <i>bceB</i> (B4)                                    | This study                   |
| pHY-B5       | Derived from pHYT-P43-G10, gRNA targeting <i>bceB</i> (B5)                                    | This study                   |
| pHY-B6       | Derived from pHYT-P43-G10, gRNA targeting <i>bceB</i> (B6)                                    | This study                   |
| pHY-B7       | Derived from pHYT-P43-G10, gRNA targeting <i>bceB</i> (B7)                                    | This study                   |
| pHY-pksA-1   | Derived from pHYT-P43-G10, gRNA targeting <i>pksA</i> ( <i>pksA-1</i> )                       | This study                   |
| pHY-pksA-2   | Derived from pHYT-P43-G10, gRNA targeting <i>pksA</i> ( <i>pksA-2</i> )                       | This study                   |
| pHY-pksB     | Derived from pHYT-P43-G10,                                                                    | This study                   |

|            |                                                                                                            |                              |
|------------|------------------------------------------------------------------------------------------------------------|------------------------------|
|            | gRNA targeting <i>pksB</i> ( <i>pksB</i> )                                                                 |                              |
| pHY-pksC   | Derived from pHYT-P43-G10, gRNA targeting <i>pksC</i> ( <i>pksC</i> )                                      | This study                   |
| pHY-pksD-1 | Derived from pHYT-P43-G10, gRNA targeting <i>pksD</i> ( <i>pksD-1</i> )                                    | This study                   |
| pHY-pksD-2 | Derived from pHYT-P43-G10, gRNA targeting <i>pksD</i> ( <i>pksD-2</i> )                                    | This study                   |
| pHY-pksE-1 | Derived from pHYT-P43-G10, gRNA targeting <i>pksE</i> ( <i>pksE-1</i> )                                    | This study                   |
| pHY-pksE-2 | Derived from pHYT-P43-G10, gRNA targeting <i>pksE</i> ( <i>pksE-2</i> )                                    | This study                   |
| pHY-pksF   | Derived from pHYT-P43-G10, gRNA targeting <i>pksF</i> ( <i>pksF</i> )                                      | This study                   |
| pHY-pksG   | Derived from pHYT-P43-G10, gRNA targeting <i>pksG</i> ( <i>pksG</i> )                                      | This study                   |
| pAD123     | <i>E. coli-Bacillus</i> shuttle plasmid, promoter-less <i>gfpmut3</i> , Cm <sup>R</sup> in <i>Bacillus</i> | Lab stock                    |
| pAD-B1     | Derived from pAD123, gRNA targeting <i>bceB</i> (B1)                                                       | This study                   |
| pAD-B2     | Derived from pAD123, gRNA targeting <i>bceB</i> (B2)                                                       | This study                   |
| pAD-B3     | Derived from pAD123, gRNA targeting <i>bceB</i> (B3)                                                       | This study                   |
| pAD-B4     | Derived from pAD123, gRNA targeting <i>bceB</i> (B4)                                                       | This study                   |
| pAD-B5     | Derived from pAD123, gRNA targeting <i>bceB</i> (B5)                                                       | This study                   |
| pAD-B6     | Derived from pAD123, gRNA targeting <i>bceB</i> (B6)                                                       | This study                   |
| pAD-B7     | Derived from pAD123, gRNA targeting <i>bceB</i> (B7)                                                       | This study                   |
| pAD-P1     | Derived from pAD123, gRNA targeting <i>psdB</i> (P1)                                                       | This study                   |
| pAD-P2     | Derived from pAD123, gRNA targeting <i>psdB</i> (P2)                                                       | This study                   |
| pAD-P3     | Derived from pAD123, gRNA targeting <i>psdB</i> (P3)                                                       | This study                   |
| pAD-P4     | Derived from pAD123, gRNA targeting <i>psdB</i> (P4)                                                       | This study                   |
| pAD-P5     | Derived from pAD123, gRNA targeting <i>psdB</i> (P5)                                                       | This study                   |
| pDGT-GFP   | <i>B. subtilis</i> integration vector, P43-GFP cassette, <i>spec</i> <sup>R</sup>                          | Lu et al., 2019 <sup>1</sup> |

|                           |                                                                                                                                                                                                        |            |
|---------------------------|--------------------------------------------------------------------------------------------------------------------------------------------------------------------------------------------------------|------------|
| pDGT-GFP-Amp <sub>m</sub> | Derived from pDGT-GFP, P43-GFP cassette, synonymous mutation in AmpR (TCT240TCC), spec <sup>R</sup>                                                                                                    | Lab stock  |
| pDGT-B2-4                 | pDGT-GFP-Amp <sub>m</sub> derivative, P <sub>veg</sub> promoter, containing gRNA expression cassette targeting <i>bceB</i> (B2, B3, and B4)                                                            | This study |
| pDGT-B1-7                 | pDGT-GFP-Amp <sub>m</sub> derivative, P <sub>veg</sub> promoter, containing gRNA expression cassette targeting <i>bceB</i> (B1, B2, B3, B4, B5, B6, and B7)                                            | This study |
| pDGT-P1-5                 | pDGT-GFP-Amp <sub>m</sub> derivative, P <sub>veg</sub> promoter, containing gRNA expression cassette targeting <i>psdB</i> (P1, P2, P3, P4, and P5)                                                    | This study |
| pDGT-P1-P5                | pDGT-GFP-Amp <sub>m</sub> derivative, P <sub>veg</sub> promoter, containing gRNA expression cassette targeting <i>psdB</i> (P1 and P5)                                                                 | This study |
| pAX-CDA-nCas9             | <i>B. subtilis</i> integration vector, P <sub>xyIA</sub> -CDA-nCas9 expression cassette, spec <sup>R</sup> , Cm <sup>R</sup>                                                                           | Lab stock  |
| pAX-ABE7.10-CDA-nCas9     | pAX-CDA-nCas9 derivative, P <sub>xyIA</sub> -ABE7.10-CDA-nCas9 expression cassette, spec <sup>R</sup> , Cm <sup>R</sup>                                                                                | This study |
| pAX-ABE8e-CDA-nCas9       | pAX-CDA-nCas9 derivative, P <sub>xyIA</sub> -ABE8e-CDA-nCas9 expression cassette, spec <sup>R</sup> , Cm <sup>R</sup>                                                                                  | This study |
| pAX-CDA-ABE7.10-nCas9     | pAX-CDA-nCas9 derivative, P <sub>xyIA</sub> -CDA-ABE7.10-nCas9 expression cassette, spec <sup>R</sup> , Cm <sup>R</sup>                                                                                | This study |
| pAX-CDA-ABE8e-nCas9       | pAX-CDA-nCas9 derivative, P <sub>xyIA</sub> -CDA-ABE8e-nCas9 expression cassette, spec <sup>R</sup> , Cm <sup>R</sup>                                                                                  | This study |
| pAX-ABE7.10-nCas9-CDA     | pAX-CDA-nCas9 derivative, P <sub>xyIA</sub> -ABE7.10-nCas9-CDA expression cassette, spec <sup>R</sup> , Cm <sup>R</sup>                                                                                | This study |
| pJOE8999                  | <i>E. coli</i> - <i>B. subtilis</i> shuttle vector, temperature sensitive replication origin of pE194 <sup>ts</sup> for <i>B. subtilis</i> , Kan <sup>R</sup> in <i>E. coli</i> and <i>B. subtilis</i> | Lab stock  |
| pJOE-B2                   | pJOE8999 derivative, gRNA targeting <i>bceB</i> (B2), Kan <sup>R</sup>                                                                                                                                 | This study |



|         |                                                                        |            |
|---------|------------------------------------------------------------------------|------------|
| pJOE-B3 | pJOE8999 derivative, gRNA targeting <i>bceB</i> (B3), Kan <sup>R</sup> | This study |
| pJOE-B4 | pJOE8999 derivative, gRNA targeting <i>bceB</i> (B4), Kan <sup>R</sup> | This study |

**Table S4. The protospacer sequences used in this study**

| sgRNA Sequences (5'-3') | PAM | Purpose                                 |
|-------------------------|-----|-----------------------------------------|
| GCCTCCATTATCTAAAGATG    | AGG | Targeting <i>sigE</i>                   |
| CGCAACAAACAGTTCATTAA    | TGG | Targeting <i>bceB</i> (B1)              |
| AGCCGCTACATTTTGTTCAG    | CGG | Targeting <i>bceB</i> (B2)              |
| TCAACATTTGCTTGCAGGAC    | AGG | Targeting <i>bceB</i> (B3)              |
| ACAGCAAGCTGCATATTGCC    | GGG | Targeting <i>bceB</i> (B4)              |
| GCCCCCGCTTGTAACGTGT     | AGG | Targeting <i>bceB</i> (B5)              |
| CACCCATTTGTTTAAAATAA    | AGG | Targeting <i>bceB</i> (B6)              |
| AACACCATCACCATAATCAT    | AGG | Targeting <i>bceB</i> (B7)              |
| ATCAGCCAGAAATATTGCAA    | AGG | Targeting <i>pksA</i> ( <i>pksA-1</i> ) |
| CACGCGCACAGGGTCAAGCA    | TGG | Targeting <i>pksA</i> ( <i>pksA-2</i> ) |
| CATTCAAAGAATAAAGTCGG    | AGG | Targeting <i>pksB</i> ( <i>pksB</i> )   |
| TCATCGCATAAAGAAAGATG    | CGG | Targeting <i>pksC</i> ( <i>pksC</i> )   |
| GTTCCCAATACTATCACATG    | GGG | Targeting <i>pksD</i> ( <i>pksD-1</i> ) |
| ACTCAATCATAAAAATGGCG    | GGG | Targeting <i>pksD</i> ( <i>pksD-2</i> ) |
| ACACAAATATCGTCAGCCAT    | CGG | Targeting <i>pksE</i> ( <i>pksE-1</i> ) |
| TCCCGCGGCAGACATTGAGA    | AGG | Targeting <i>pksE</i> ( <i>pksE-2</i> ) |
| CACGGGATTAGCATATACGG    | TGG | Targeting <i>pksF</i> ( <i>pksF</i> )   |
| GCACCGGACAATGATGCGTA    | AGG | Targeting <i>pksG</i> ( <i>pksG</i> )   |
| AAACACACAGCTTAAAAAGT    | AGG | Targeting <i>psdB</i> (P1)              |
| CGCTCAAGCATGTTTTGACA    | AGG | Targeting <i>psdB</i> (P2)              |
| TAACAGGCCTGCTCCAATGC    | CGG | Targeting <i>psdB</i> (P3)              |
| CTGAAACAGGATGAGAAAGC    | CGG | Targeting <i>psdB</i> (P4)              |
| ATTAACACTAAAATCAAAT     | TGG | Targeting <i>psdB</i> (P5)              |

**Table S5. The mutations of PsdB**

| Mutants | Position of mutation                                   |
|---------|--------------------------------------------------------|
| M1      | PsdB (V26T/L59P/L126P/I164T, F166L/V236A, L237S)       |
| M2      | PsdB (V26A/S60N/L126P/I164T, L165P, F166L/V236A)       |
| M3      | PsdB (V26A/L59S, S60N/L126P/L165P, F166L/L235S, V236A) |

|    |                                                                  |
|----|------------------------------------------------------------------|
| M4 | PsdB (C25R, V26A/L59P/L126P/L165P,<br>F166L/V236A, L237S)        |
| M5 | PsdB (V26A/L59S, S60N/L126P/I164T, L165P,<br>F166S/V236A, L237P) |
| M6 | PsdB (V26A/L59S, S60N, A61T/L126P,<br>L127S/F166L/V236A, L237S)  |
| M7 | PsdB (V26A)                                                      |
| M8 | PsdB (V26A/L235S)                                                |

## Supplementary Figure

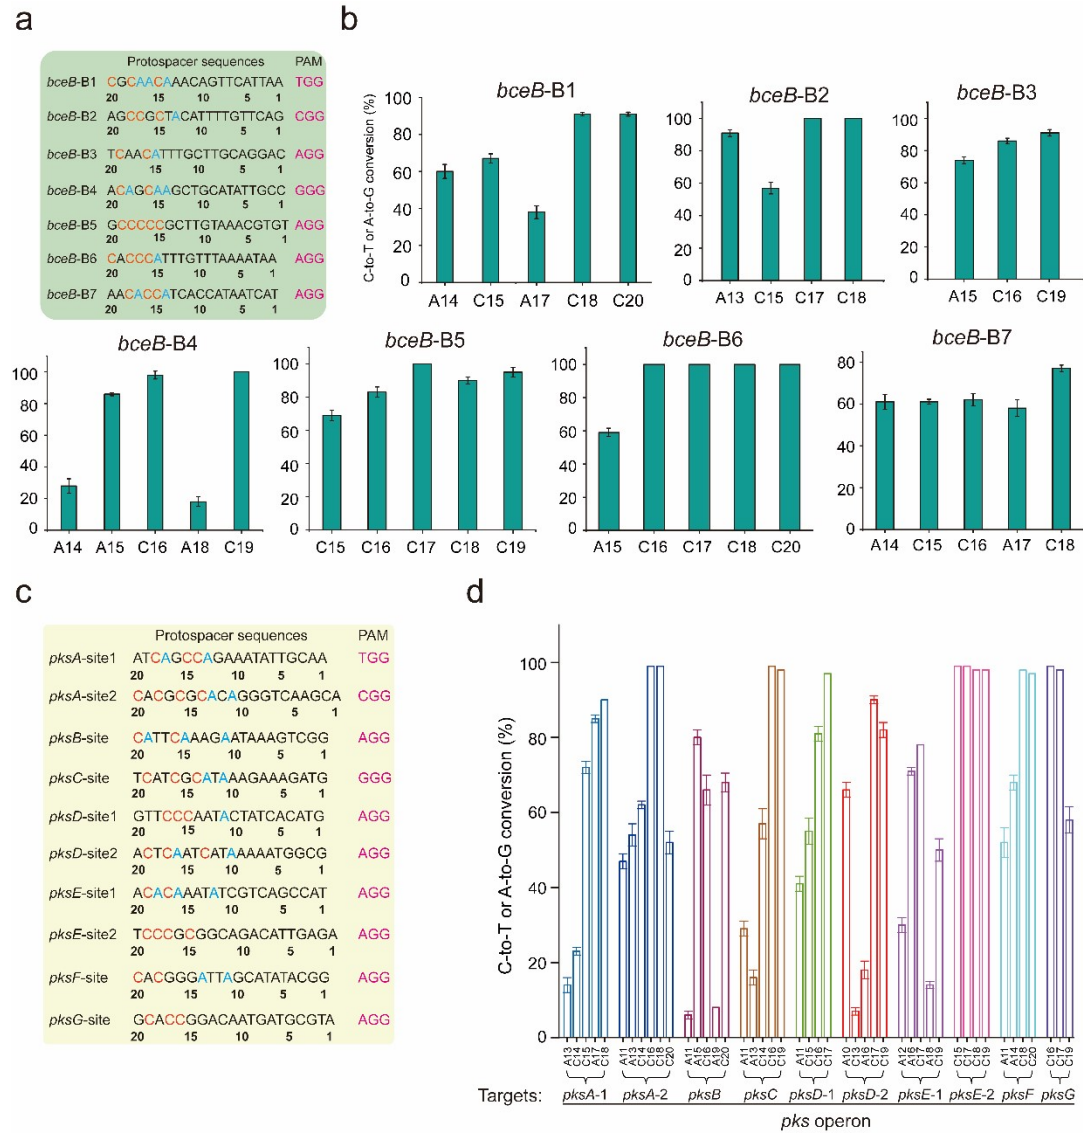

**Fig. S1 The base editing efficiency of the dual-base editor for the *bceB* gene and *pks* operon. (a) The protospacer sequences for the editing of *bceB*. (b) Base conversion efficiencies of the dual-base editor with the corresponding single sgRNA (B1-B7) targeting *bceB*. (c) The protospacer sequences for the editing of *pks* operon. (d) Base conversion efficiencies of the dual-base editor with the corresponding single sgRNA (*pk*sA-1, *pk*sA-2, *pk*sB, *pk*sC, *pk*sD-1, *pk*sD-2, *pk*sE-1, *pk*sE-2, *pk*sF, and *pk*sG) targeting *pks* operon.**

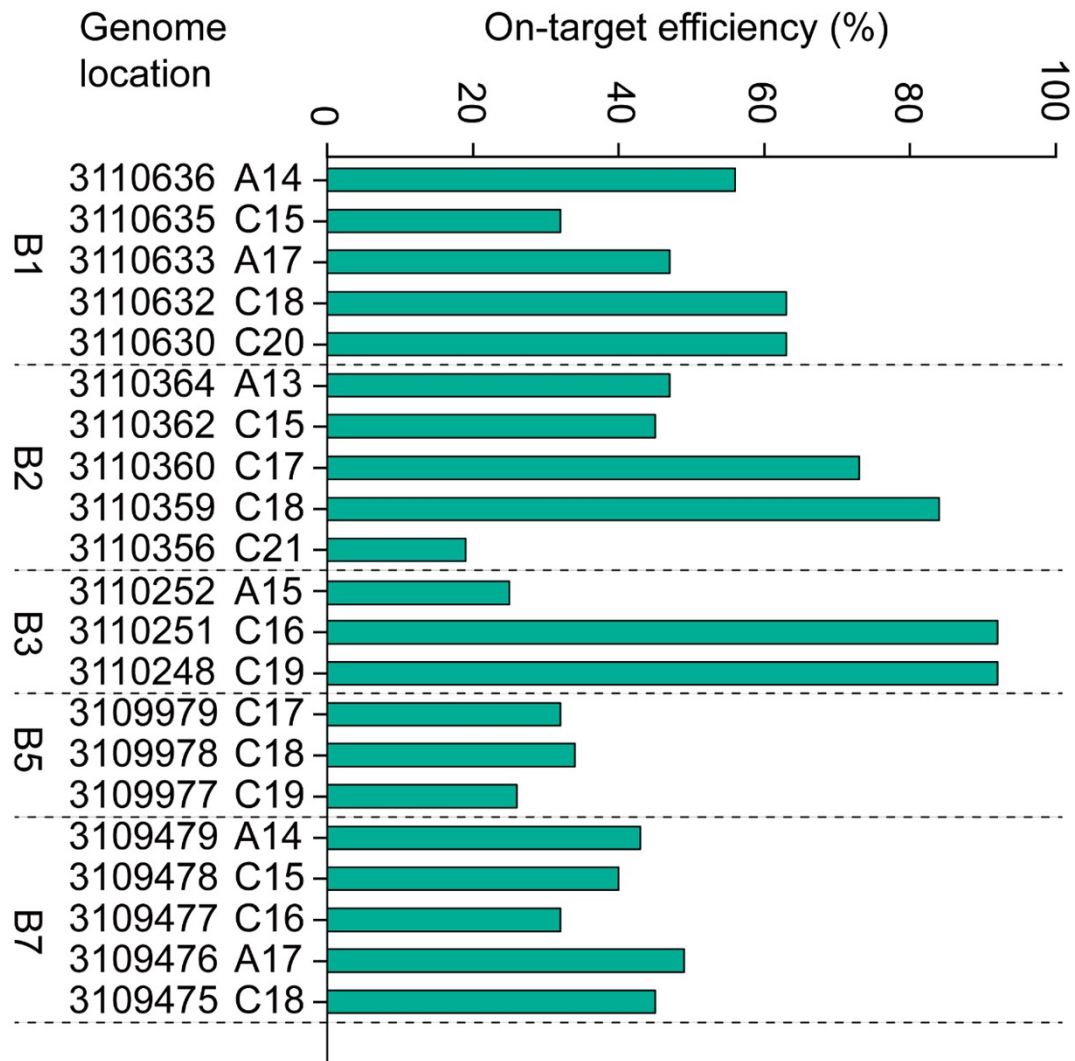

**Fig. S2 Genome-wide off-target evaluation of dual-base editor.** The high-throughput sequencing results shown that there were no mutations at non-specific sites except for the sgRNA-targeting specific sites (B1, B2, B3, B5, and B7). Thus, the contrast on-target efficiencies of *bceB* sites (B1, B2, B3, B5, and B7) were shown. The corresponding positions of DNA on-target are indicated at the genome-scale. Corresponding sgRNA sequences targeting *bceB* are listed in Table S4. The high-throughput sequencing data of this study are available at the Sequence Read Archive (PRJNA808834) of the NCBI.

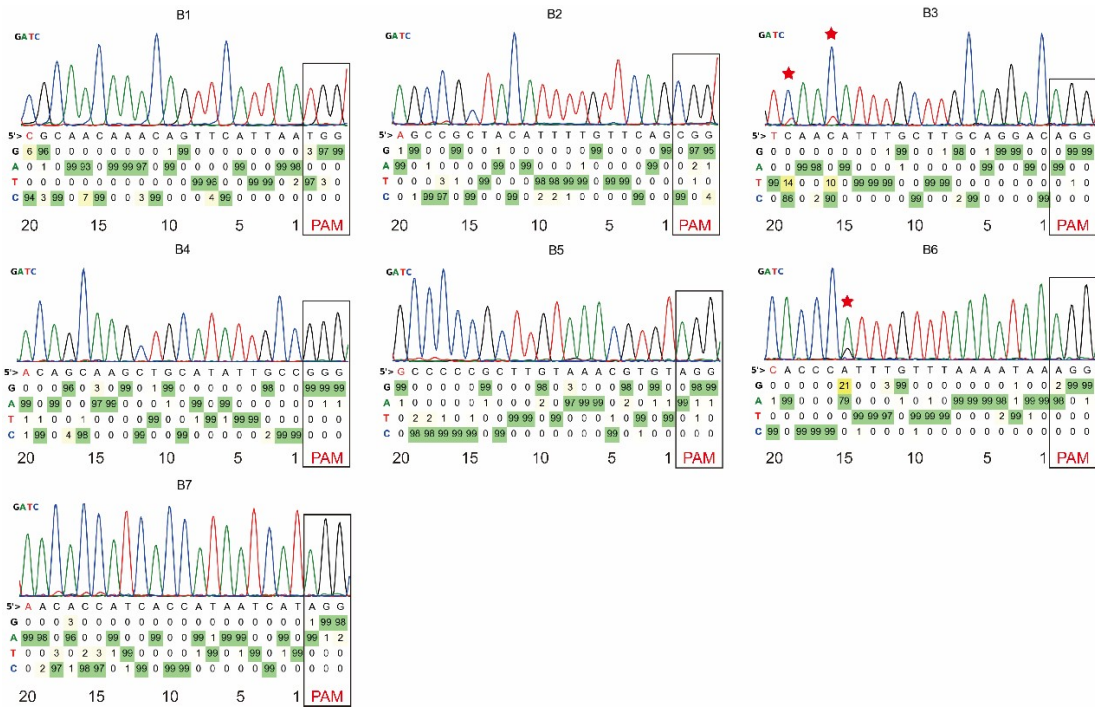

**Fig. S3 Sample image output of the sequencing data of the editing of *bceB* from the BEAT analysis.** The base conversion efficiencies of the dual-base editor with an sgRNA array (B1-7) targeting *bceB* under the absence of xylose. The raw sequencing data is quantitatively analyzed by BEAT<sup>2</sup>. The order of partial bases is numbered and PAM motifs are framed with black rectangle. The mutated bases are indicated in red stars.

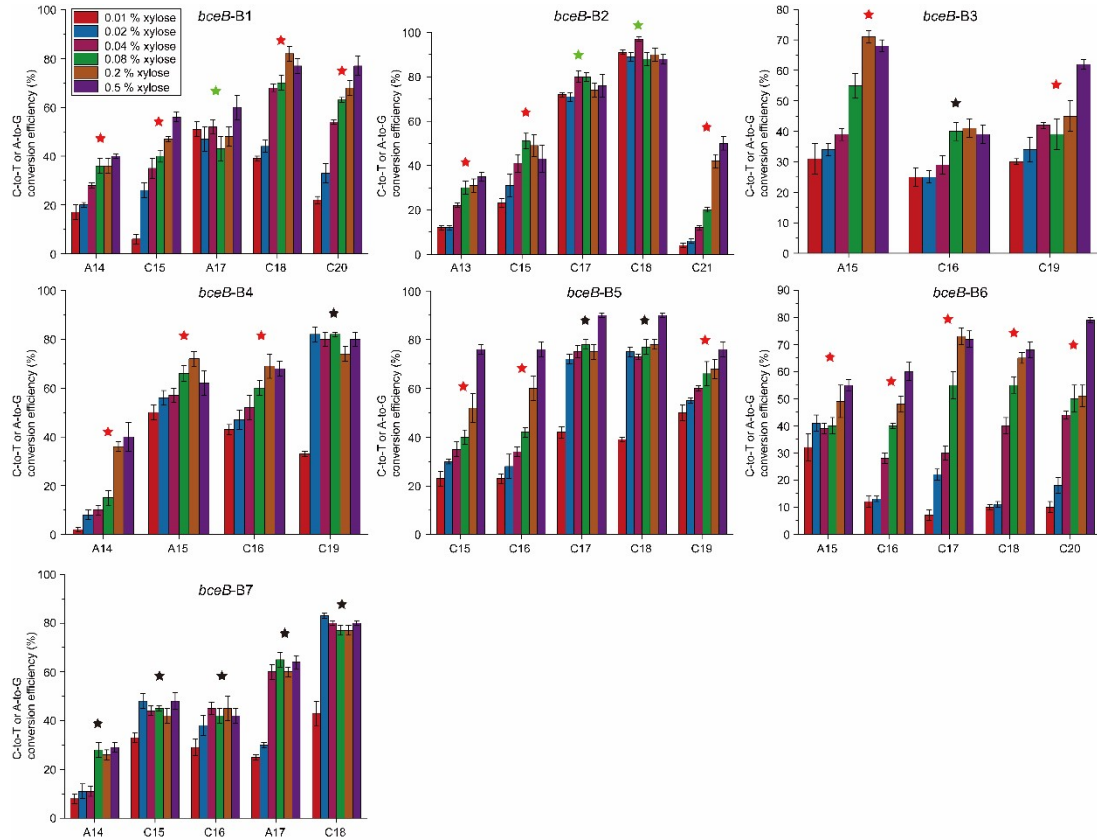

**Fig. S4 Base conversion efficiencies of the dual-base editor with an sgRNA array (B1-7) targeting *bceB* at different xylose concentration.** Quantitative analyses of base conversion efficiencies of the dual-base editor for the editing of *bceB* with an sgRNA array (B1-7). Similar editing pattern is indicated with stars of different colors.



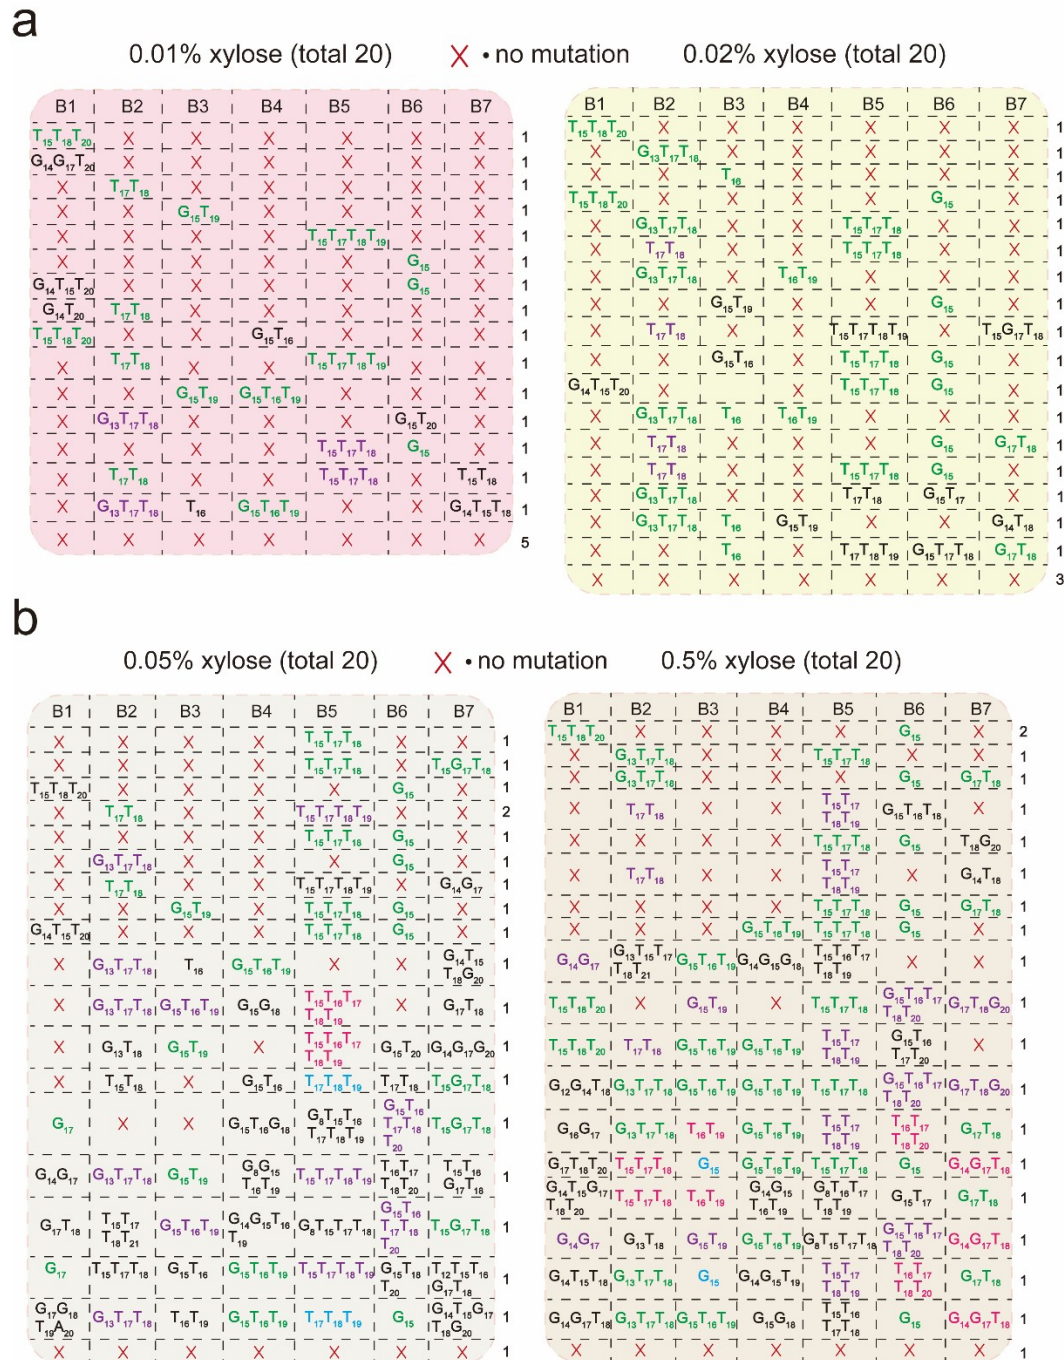

**Fig. S5 Identification of genetic diversity for multiplex editing of *bceB* at the single-clone level under different xylose concentrations. (a) Identification of genetic diversity for multiplex editing of *bceB* with an sgRNA array (B1-7) under 0.01% and 0.02% xylose concentrations, respectively. (b) Identification of genetic diversity for multiplex editing of *bceB* with an sgRNA array (B1-7) under 0.05% and 0.5% xylose concentrations, respectively. The identical genotype at the same site is showed in the same color.**

a

— • no mutation

| Multiplex editing (total 30) |                 |                 |   | Sequential editing (total 30) |                 |                 |   |
|------------------------------|-----------------|-----------------|---|-------------------------------|-----------------|-----------------|---|
| <i>bceB</i> -B2              | <i>bceB</i> -B3 | <i>bceB</i> -B4 |   | <i>bceB</i> -B2               | <i>bceB</i> -B3 | <i>bceB</i> -B4 |   |
| A13C17C18                    | —               | —               | 2 | A13C15C17C18                  | A15C16C19       | A14A15C16C19    | 2 |
| —                            | C16C19          | —               | 1 | C15C17C18                     | A15C16C19       | A15C16C19       | 2 |
| —                            | —               | A14A15C16C19    | 1 | C15C17C18                     | A15C16          | A14A15C16       | 2 |
| A13C15C17                    | A15C16          | —               | 1 | C15C17C18                     | A15C16C19       | C16C19          | 2 |
| C15C17C18                    | A15C19          | —               | 1 | A13C15C17C18                  | A15C16C19       | A14A15C16A18C19 | 3 |
| C17                          | A15C19          | —               | 1 | A13C17C18                     | A15C19          | C16C19          | 3 |
| C15C18                       | A15             | —               | 2 | C15C17C18                     | C16C19          | A15C16C19       | 4 |
| A13C17C18                    | —               | A14A15          | 2 | A13C15C17C18                  | A15C16          | A15C16C19       | 5 |
| C17C18                       | —               | A14A15A18       | 1 | A13C17C18                     | C16C19          | A14C16C19       | 7 |
| —                            | C16C19          | A14C19          | 1 | C15C17C18                     | C16C19          | A15C16C19       | 4 |
| C18                          | A15C16C19       | C16A18C19       | 1 | A13C15C17C18                  | A15C16C19       | A15C16C19       | 5 |
| A13C18                       | A15             | A14C16C19       | 1 | A13C17C18                     | C16C19          | A14C16C19       | 7 |
| A13C15C17                    | A15C16C19       | A14C16C19       | 1 |                               |                 |                 |   |
| A13C15C18                    | A15C16C19       | A14A15C16       | 1 |                               |                 |                 |   |
| A13C15C17C18                 | A15C16C19       | A14A18C19       | 5 |                               |                 |                 |   |
| A13C15C17C18                 | A15C16C19       | A14C16C19       | 8 |                               |                 |                 |   |

VS.

b

— • no mutation

| Multiplex editing (total 50) |                 |                 |   | Sequential editing (total 50) |                 |                 |   |
|------------------------------|-----------------|-----------------|---|-------------------------------|-----------------|-----------------|---|
| <i>bceB</i> -B2              | <i>bceB</i> -B3 | <i>bceB</i> -B4 |   | <i>bceB</i> -B2               | <i>bceB</i> -B3 | <i>bceB</i> -B4 |   |
| A13C17C18                    | —               | —               | 4 | A13C15C17C18                  | A15C16C19       | A14A15C16C19    | 8 |
| A11C17C18                    | —               | —               | 2 | C15C17C18                     | A15C16C19       | A15C16C19       | 6 |
| —                            | A15C16C19       | —               | 2 | C15C17C18                     | A15C16          | A14A15C16       | 5 |
| —                            | C16C19          | —               | 2 | A13C15C17C18                  | A15C16C19       | A14C16C19       | 6 |
| C17                          | A15C19          | —               | 2 | C15C17C18                     | C16C19          | A14A15C16       | 2 |
| A13C17C18                    | C19             | —               | 1 | A13C17C18                     | A15C19          | C16C19          | 8 |
| C17C18                       | C16C19          | —               | 1 | C15C18                        | C16C19          | A15C16C19       | 4 |
| A13C15C17                    | C16C19          | —               | 1 | A13C15C17C18                  | A15C16          | A15C16C19       | 5 |
| C17C18                       | —               | C16C19          | 2 | A13C17C18                     | C16C19          | A14C16C19       | 4 |
| A13C17C18                    | —               | A14A15A18       | 5 | C17C18                        | C16C19          | C16C19          | 2 |
| —                            | C16C19          | C15C16C19       | 6 |                               |                 |                 |   |
| —                            | C16C19          | A14C16C19       | 2 |                               |                 |                 |   |
| A13C15C17C18                 | A15C16C19       | A14C16C19       | 6 |                               |                 |                 |   |
| A13C15C17                    | A15C16C19       | C15C16C19       | 4 |                               |                 |                 |   |
| A11A13                       | A15C16C19       | C16C19          | 4 |                               |                 |                 |   |
| C15C18                       | C16C19          | A14C16C19       | 2 |                               |                 |                 |   |
| A13C15C17                    | A15C16C19       | A14C16C19       | 2 |                               |                 |                 |   |
| C15C17C18                    | C16             | C16C19          | 2 |                               |                 |                 |   |

VS.

**Fig. S6 Identification and comparison of genetic diversification between multiplex editing and multiple rounds of single editing at the single-clone level. (a)** Identification of genetic diversification of 30 colonies from multiplex editing system and multiple rounds of single editing system, respectively. **(b)** Identification of genetic diversification of 50 colonies from multiplex editing system and multiple rounds of single editing system, respectively. The purple rectangles suggest that new mutants are different from the previous identification in 30 colonies.



| sgRNA<br>Variants | P1        | P2        | P3     | P4           | P5        |
|-------------------|-----------|-----------|--------|--------------|-----------|
| M1                | C15A16C17 | A14A15    | A16C17 | A10A15C20    | A14A17    |
| M2                | A14A16    | C16C18    | A16C17 | A10A13A15C20 | A14C15    |
| M3                | A14A16C17 | A15C18    | A16C17 | A13A15C20    | A11A14    |
| M4                | A12A14A16 | A14A15    | A16C17 | A13A15C20    | A14A17    |
| M5                | A16C17    | A15C18    | A16C17 | A10A13A16    | A14A16A17 |
| M6                | A14A16    | A15C18C20 | A16A19 | A15A17C20    | A14A17    |
| M7                | A16C17    |           |        |              |           |
| M8                | A16C17    |           |        |              | A11       |

**Fig. S7 Identification of PsdB mutants by single-clone sequencing.** Six mutants (M1, M2, M3, M4, M5, and M6) with different tolerance to nisin were selected to identify the types of mutations by sequencing. Moreover, the mutants PsdB-V26A (M7) and PsdB-V26A/L235S (M8) were also identified by sequencing. P1-5 denote sgRNAs targeting different loci of *psdB*, respectively. All sgRNA sequences targeting PsdB and amino acid substitutions in PsdB are shown in Table S4 and Table S5.

### Supplementary method

The preparation of relevant medias:

- 1) Every 2mL SPI contains 980  $\mu$ L SPI-A, 980  $\mu$ L SPI-B, 20  $\mu$ L Glucose (50%), and 20  $\mu$ L CAYE;
- 2) Every 2mL SPII contains 1960  $\mu$ L SPI, 20  $\mu$ L CaCl<sub>2</sub> (5 mM), and 20  $\mu$ L MgCl<sub>2</sub> (250mM);
- 3) SPI-A contains 4 g/L (NH<sub>4</sub>)<sub>2</sub>SO<sub>4</sub>, 28 g/L K<sub>2</sub>HPO<sub>4</sub>·3H<sub>2</sub>O, 12 g/L KH<sub>2</sub>PO<sub>4</sub>, and 2 g/L sodium citrate;
- 4) SPI-B was 0.4 g/L Mg<sub>2</sub>SO<sub>4</sub>·7H<sub>2</sub>O;
- 5) CAYE contains 20 g/L casamino acid and 100 g/L yeast extract;
- 6) SPI-A, SPI-B, 50% Glucose, CAYE, 5 mM CaCl<sub>2</sub>, 250mM MgCl<sub>2</sub>, and 10 mM EGTA (adjusting pH to 8.0 by NaOH) were sterilized at 121 °C for 15 min separately.

### Supplementary sequences

pHY plasmid related key genetic parts

TATTTTTTTGCCAAAGCTGTAATGGCTGAAAATTCTTACATTTATTTTACAT

TTTTAGAAATGGGCGTGAAAAAAGCGCGCGATTATGTAAAATATAAANN  
NNNNNNNNNNNNNNNNNNNGTTTTAGAGCTAGAAATAGCAAGTTAAAATA  
AGGCTAGTCCGTTATCAACTTGAAAAAGTGGCACCGAGTCGGTGCTTTTTT

Annotations:

P43 promoter, alternative 20 base target site, tracr RNA terminator

pDGT plasmids related key genetic parts

pDGT-GFP

ATGTTTGCAAACGATTCAAACCTCTTTACTGCCGTTATTCGCTGGATTT  
TTATTGCTGTTTCATTTGGTTCTGGCAGGACCGGCGGCTGCGAGTGCTGAA  
ACGGCGAACAAATCGAATGAGCTTACAGCACCGTCGATCAAAGCGGAA  
CCATTCTTCATGCATGGAATTGGTCGTTCAATACGTTAAAACACAATATGA  
AGGATATTCATGATGCAGGATATACAGCCATTCAGACATCTCCGATTAAC  
CAAGTAAAGGAAGGAATCAAGGAGATAAAAGCATGTCGAACTGGTACT  
GGCTGTATCAGCCGACATCGTATCAAATTGGCAACCGTTACTTAGGTACT  
GAACAAGAATTTAAAGAAATGTGTGCAGCCGCTGAAGAATATGGCATAA  
AGGTCATTGTTGACGCGGTCATCAATCATAACCACAGTGATTATGCCGCG  
ATTTCCAATGAGGTTAAGAGTATTTCAAACCTGGACACATGGAAACACACA  
AATTA AAAACTGGTCTGATCGGATCTTCAGGCATCAAATAAAACGAAAGG  
CTCAGTCGAAAGACTGGGCCTTTTCGTTTTATCTGTTGTTTGTTCGGTGAACG  
CTCTCCTGAGTAGGACAAATCCGCCGCTCTAGCTAAGCAGAAGGCCATCC  
TGACGGATGGCCTTTTACGCGTCGACGGGATCCTCCAAGAGACCTGATAG  
GTGGTATGTTTTCGCTTGAACCTTTTAAATACAGCCATTGAACATACGGTTG  
ATTTAATAACTGACAAACATCACCTCTTGCTAAAGCGGCCAAGGACGCT  
GCCGCCGGGGCTGTTTGCGTTTTTGGCGTGATTTTCGTGTATCATTGGTTTAC  
TTATTTTTTTTGCCAAAGCTGTAATGGCTGAAAATTCTTACATTTATTTTACA  
TTTTTAGAAATGGGCGTGAAAAAAGCGCGCGATTATGTAAAATATAAAG  
TGATAGCGGTACCATTATAGAAAGGAGGTGATAAAAATGCGTAAAGGAG  
AAGA ACTTTTCACTGGAGTTGTCCCAATTCTTGTTGAATTAGATGGTGATG  
TTAATGGGCACAAATTTTCTGTCAGTGGAGAGGGTGAAGGTGATGCAACA  
TACGGAAA ACTTACCCTTAAATTTATTTGCACTACTGGAAA ACTACCTGTT  
CCATGGCCAACACTTGTCACTACTTTTCGGTTATGGTGTTC AATGCTTTGCG  
AGATACCCAGATCATATGAAACGGCATGACTTTTTCAAGAGTGCCATGCC  
CGAAGGTTATGTACAGGAAAGAACTATATTTTTCAAAGATGACGGGAACT  
ACAAGACACGTGCTGAAGTCAAGTTTGAAGGTGATACCCTTGTTAATAGA  
ATCGAGTTAAAAGGTATTGATTTTAAAGAAGATGGAAACATTCTTGGACA  
CAAATTGGAATACA ACTATAACTCACACAATGTATACATCATGGCAGACA  
AACAAAAGAATGGAATCAAAGTTAACTTCAA AATTAGACACAACATTGA  
AGATGGAAGCGTTCAACTAGCAGACCATTATCAACAAAATACTCCAATTG  
GCGATGGCCCTGTCCTTTTACCAGACAACCATTACCTGTCCACACAATCTG  
CCTTTTCGAAAGATCCCAACGAAAAGAGAGACCACATGGTCCTTCTTGAG  
TTTGTAACAGCTGCTGGGATTACACATGGCATGGATGAACTATACAAATA

AGGTCTCAGCTTAAGCTTGGGCTTAATTAATTAAGACTCCTGTTGATAGAT  
CCAGTAATGACCTCAGAACTCCATCTGGATTTGTTTCAGAACGCTCGGTTGC  
CGCCGGGCGTTTTTTATTGGTGAGAATCCCGGGGAATTCCTGCAGCCCTGG  
CGAATGGCGATTTTCGTTTCGTGAATACATGTTATAATAACTATAACTAATA  
ACGTAACGTGACTGGCAAGAGATATTTTTAAAACAATGAATAGGTTTACA  
CTTACTTTAGTTTTATGGAAATGAAAGATCATATCATATATAATCTAGAAT  
AAAATTAACTAAAATAATTATTATCTAGATAAAAAATTTAGAAGCCAATG  
AAATCTATAAATAAACTAAATTAAGTTTATTTAATTAACAACACTATGGATAT  
AAAATAGGTAATAATCAAAATAGTGAGGAGGATATATTTGAATACATACG  
AACAAATTAATAAAGTGAAAAAATACTTCGGAAACATTTAAAAAATAAC  
CTTATTGGTACTTACATGTTTGGATCAGGAGTTGAGAGTGGACTAAAACC  
AAATAGTGATCTTGACTTTTTAGTCGTCGTATCTGAACCATTGACAGATCA  
AAGTAAAGAAATACTTATACAAAAAATTAGACCTATTTCAAAAAAATAG  
GAGATAAAAGCAACTTACGATATATTGAATTAACAATTATTATTCAGCAA  
GAAATGGTACCGTGGAATCATCCTCCCAAACAAGAATTTATTTATGGAGA  
ATGGTTACAAGAGCTTTATGAACAAGGATACATTCCTCAGAAGGAATTA  
ATTCAGATTTAACCATAATGCTTTACCAAGCAAAACGAAAAAATAAAAGA  
ATATACGGAAATTATGACTTAGAGGAATTACTACCTGATATTCCATTTTCT  
GATGTGAGAAGAGCCATTATGGATTCGTCAGAGGAATTAATAGATAATTA  
TCAGGATGATGAAACCAACTCTATATTAACCTTTATGCCGTATGATTTAAC  
TATGGACACGGGTAAAATCATACCAAAGATATTGCGGGAAATGCAGTG  
GCTGAATCTTCTCCATTAGAACATAGGGAGAGAATTTTGTTAGCAGTTCGT  
AGTTATCTTGGAGAGAATATTGAATGGACTAATGAAAATGTAAATTTAAC  
TATAAACTATTTAAATAACAGATTAAAAAAATTATAAAAAAATTGAAAAA  
ATGGTGGAAACACTTTTTCAATTTTTTTGTTTTATTATTTAATATTTGGGA  
AATATTCATTCTAATTGGTAATCAGATTTTAGAAAACAATAAACCCCTTGCA  
TAGGGGGATCTCGACATGGATGAGCGATGATGATATCCGTTTAGGCTGGG  
CGGTGATAGCTTCTCGTTCAGGCAGTACGCCTCTTTTCTTTTCCAGACCTG  
AGGGAGGCGGAAATGGTGTGAGGTTCCCGGGGAAAAGCCAAATAGGCGA  
TCGCGGGAGTGCTTTATTTGAAGATCAGGCTATCACTGCGGTCAATAGATT  
TCACAATGTGATGGCTGGACAGCCTGAGGAACCTCTCGAACCCGAATGGAA  
ACAACCAGATATTTATGAATCAGCGCGGCTCACATGGCGTTGTGCTGGCA  
AATGCAGGTTTCATCCTCTGTCTCTATCAATACGGCAACAAAATTGCCTGAT  
GGCAGGTATGACAATAAAGCTGGAGCGGGTTCATTTCAAGTGAACGATGG  
TAAACTGACAGGCACGATCAATGCCAGGTCTGTAGCTGTGCTTTATCCTG  
ATGATATTGCAAAGCGCCTCATGTTTTCTTGAGAATTACAAAACAGGT  
GTAACACATTCTTTCAATGATCAACTGACGATTACCTTGCCTGCAGATGCG  
AATACAACAAAAGCCGTTTATCAAATCAATAATGGACCAGACGACAGGC  
GTTTAAGGATGGAGATCAATTCACAATCGGAAAAGGAGATCCAATTTGGC  
AAAACATACACCATCATGTTAAAAGGAACGAACAGTGATGGTGTAACGA  
GGACCGAGAAATACAGTTTTGTTAAAAGAGATCCAGCGTCGGCCAAAACC  
ATCGGCTATCAAATCCGAATCATTGGAGCCAGGTAATGCTTATATCTA  
TAAACATGATGGGAGCCGAGTAATTGAATTGACCGGATCTTGGCCTGGAA  
AACCAATGACTAAAATGCAGACGGAATTTACACGCTGACGCTGCCTGCG

GACACGGATACAACCAACGCAAAAGTGATTTTTAATAATGGCAGCGCCCA  
AGTGCCCGGTCAGAATCAGCCTGGCTTTGATTACGTGCTAAATGGTTTATA  
TAATGACTCGGGCTTAAGCGGTTCTCTTCCCCATTGA

Annotations:

*amyE* upstream homologous arm, *rrnB* T1 terminator, *rrnB* T2 terminator, P43 promoter, RBS, *GFP* gene, lambda t0 terminator, spectinomycin resistant gene expression cassette, *amyE* downstream homologous arm

pDGT-B1-B7

ATGTTTGCAAACGATTCAAACCTCTTTACTGCCGTTATTCGCTGGATTT  
TTATTGCTGTTTCATTTGGTTCTGGCAGGACCGGCGGCTGCGAGTGCTGAA  
ACGGCGAACAAATCGAATGAGCTTACAGCACCGTCGATCAAAGCGGAA  
CCATTCTTCATGCATGGAATTGGTCGTTCAATACGTTAAAACACAATATGA  
AGGATATTCATGATGCAGGATATACAGCCATTCAGACATCTCCGATTAAC  
CAAGTAAAGGAAGGAATCAAGGAGATAAAAGCATGTCGAACTGGTACT  
GGCTGTATCAGCCGACATCGTATCAAATTGGCAACCGTTACTTAGGTACT  
GAACAAGAATTTAAAGAAATGTGTGCAGCCGCTGAAGAATATGGCATAA  
AGGTCATTGTTGACGCGGTCATCAATCATAACCACAGTGATTATGCCGCG  
ATTTCCAATGAGGTTAAGAGTATTTCAAACCTGGACACATGGAAACACACA  
AATTA AAAACTGGTCTGATCGGATCTTCAGGCATCAAATAAAACGAAAGG  
CTCAGTCGAAAGACTGGGCCTTTTCGTTTTATCTGTTGTTTGTTCGGTGAACG  
CTCTCCTGAGTAGGACAAATCCGCCGCTCTAGCTAAGCAGAAGGCCATCC  
TGACGGATGGCCTTTTACGCGTCGACGGGATCCTCCAAGAGACCTTATTA  
ACGTTGATATAATTTAAATTTTATTTGACAAAAATGGGCTCGTGTTGTACA  
ATAAATGTAGCCGCTACATTTTGTTCAGGTTTTAGAGCTAGAAATAGCAA  
GTTAAAATAAGGCTAGTCCGTTATCAACTTGAAAAAGTGGCACCGAGTCG  
GTGCTTTTTTGGTGTATTAAACGTTGATATAATTTAAATTTTATTTGACAAA  
AATGGGCTCGTGTTGTACAATAAATGTTCAACATTTGCTTGCAGGACGTTT  
TAGAGCTAGAAATAGCAAGTTAAAATAAGGCTAGTCCGTTATCAACTTGA  
AAAAGTGGCACCGAGTCGGTGCTTTTTTCCATTTATTAACGTTGATATAAT  
TTAAATTTTATTTGACAAAAATGGGCTCGTGTTGTACAATAAATGTACAGC  
AAGCTGCATATTGCCGTTTTAGAGCTAGAAATAGCAAGTTAAAATAAGGC  
TAGTCCGTTATCAACTTGAAAAAGTGGCACCGAGTCGGTGCTTTTTTGGCT  
TTATTAACGTTGATATAATTTAAATTTTATTTGACAAAAATGGGCTCGTGT  
TGTACAATAAATGTCACCCATTTGTTTAAAATAAGTTTTAGAGCTAGAAAT  
AGCAAGTTAAAATAAGGCTAGTCCGTTATCAACTTGAAAAAGTGGCACCG  
AGTCGGTGCTTTTTTATGCTTATTAACGTTGATATAATTTAAATTTTATTTG  
ACAAAAATGGGCTCGTGTTGTACAATAAATGTCGCAACAAACAGTTCATT  
AAGTTTTAGAGCTAGAAATAGCAAGTTAAAATAAGGCTAGTCCGTTATCA  
ACTTGAAAAAGTGGCACCGAGTCGGTGCTTTTTTACTTTTATTAACGTTGA  
TATAATTTAAATTTTATTTGACAAAAATGGGCTCGTGTTGTACAATAAATG  
TGCCCCCGCTTGTAACGTTGTTTATAGAGCTAGAAATAGCAAGTTAAA  
TAAGGCTAGTCCGTTATCAACTTGAAAAAGTGGCACCGAGTCGGTGCTTT

TTTTAGCTTATTAACGTTGATATAATTTAAATTTTATTTGACAAAAATGGG  
CTCGTGTTGTACAATAAATGTAACACCATCACCATAATCATGTTTTAGAGC  
TAGAAATAGCAAGTTAAAATAAGGCTAGTCCGTTATCAACTTGAAAAAGT  
GGCACCGAGTCGGTGCTTTTTTGCTTAAGCTTGGGCTTAATTAATTAAGAC  
TCCTGTTGATAGATCCAGTAATGACCTCAGA ACTCCATCTGGATTTGTTCA  
GAACGCTCGGTTGCCGCCGGGCGTTTTTTATTGGTGAGAATCCCGGGGAA  
TTCCTGCAGCCCTGGCGAATGGCGATTTTCGTTTCGTGAATACATGTTATAA  
TAACTATAACTAATAACGTAACGTGACTGGCAAGAGATATTTTTAAAACA  
ATGAATAGGTTTACACTTACTTTAGTTTTATGGAAATGAAAGATCATATCA  
TATATAATCTAGAATAAAATTA ACTAAAATAATTATTATCTAGATAAAAA  
ATTTAGAAGCCAATGAAATCTATAAATAAACTAAATTAAGTTTATTTAATT  
AACAACTATGGATATAAAATAGGTA ACTAATCAAAATAGTGAGGAGGATAT  
ATTTGAATACATACGAACAAATTAATAAAGTGAAAAAATACTTCGGAAA  
CATTTAAAAAATAACCTTATTGGTACTTACATGTTTGGATCAGGAGTTGAG  
AGTGGACTAAAACCAAATAGTGATCTTGACTTTTTAGTCGTCGTATCTGAA  
CCATTGACAGATCAAAGTAAAGAAATACTTATACAAAAAATTAGACCTAT  
TTCAAAAAATAAGGAGATAAAAGCAACTTACGATATATTGAATTAACAA  
TTATTATTCAGCAAGAAATGGTACCGTGGAAATCATCCTCCCAAACAAGAA  
TTTATTTATGGAGAATGGTTACAAGAGCTTTATGAACAAGGATACATTCT  
CAGAAGGAATTAATTCAGATTTAACCATAATGCTTTACCAAGCAAAACG  
AAAAAATAAAAGAATATACGGAAATTATGACTTAGAGGAATTACTACCTG  
ATATTCCATTTTCTGATGTGAGAAGAGCCATTATGGATTCGTCAGAGGAAT  
TAATAGATAATTATCAGGATGATGAAACCAACTCTATATTA ACTTTATGCC  
GTATGATTTTAACTATGGACACGGGTAAAATCATAACCAAAGATATTGCG  
GGAAATGCAGTGGCTGAATCTTCTCCATTAGAACATAGGGAGAGAATTTT  
GTTAGCAGTTCGTAGTTATCTTGGAGAGAATATTGAATGGACTAATGAAA  
ATGTAAATTTAACTATAAACTATTTAAATAACAGATTA AAAAAAATTATAA  
AAAAATTGAAAAAATGGTGGAAACACTTTTTTCAATTTTTTTGTTTTATTA  
TTAATATTTGGGAAATATTCATTCTAATTGGTAATCAGATTTTAGAAAAC  
AATAAACCTTGCATAGGGGGATCTCGACATGGATGAGCGATGATGATAT  
CCGTTTAGGCTGGGCGGTGATAGCTTCTCGTTCAGGCAGTACGCCCTTTTT  
CTTTCCAGACCTGAGGGAGGCGGAAATGGTGTGAGGTTCCCGGGGAAAA  
GCCAAATAGGCGATCGCGGGAGTGCTTTATTTGAAGATCAGGCTATCACT  
GCGGTCAATAGATTTACAATGTGATGGCTGGACAGCCTGAGGAACTCTC  
GAACCCGAATGGAAACAACCAGATATTTATGAATCAGCGCGGCTCACATG  
GCGTTGTGCTGGCAAATGCAGGTTTCATCCTCTGTCTCTATCAATACGGCAA  
CAAATTCCTGATGGCAGGTATGACAATAAAGCTGGAGCGGGTTCATTT  
CAAGTGAACGATGGTAAACTGACAGGCACGATCAATGCCAGGTCTGTAGC  
TGTGCTTTATCCTGATGATATTGCAAAGCGCCTCATGTTTTCTTGAGAA  
TTACAAAACAGGTGTAACACATTCTTTCAATGATCAACTGACGATTACCTT  
GCGTGCAGATGCGAATACAACAAAAGCCGTTTATCAAATCAATAATGGAC  
CAGACGACAGGCGTTTAAGGATGGAGATCAATTCACAATCGGAAAAGGA  
GATCCAATTTGGCAAACATACACCATCATGTTAAAAGGAACGAACAGTG  
ATGGTGTAACGAGGACCGAGAAATACAGTTTTGTAAAAGAGATCCAGCG

TCGGCCAAAACCATCGGCTATCAAAATCCGAATCATTGGAGCCAGGTAAA  
TGCTTATATCTATAAACATGATGGGAGCCGAGTAATTGAATTGACCGGAT  
CTTGGCCTGGAAAACCAATGACTAAAAATGCAGACGGAATTTACACGCTG  
ACGCTGCCTGCGGACACGGATACAACCAACGCAAAAAGTGATTTTTAATAA  
TGGCAGCGCCCAAGTGCCCGGTCAGAATCAGCCTGGCTTTGATTACGTGC  
TAAATGGTTTATATAATGACTCGGGCTTAAGCGGTTCTCTTCCCCATTGA

Annotations:

*amyE* upstream homologous arm, *rrnB* T1 terminator, *rrnB* T2 terminator, P43 promoter, RBS, *GFP* gene, lambda t0 terminator, Pveg promoter, sgRNA scaffold, spectinomycin resistant gene expression cassette, *amyE* downstream homologous arm  
The highlighted part in turn indicates the targeted sequence of B2, B3, B4, B6, B1, B5, and B7.

pAX plasmids related key genetic parts

pAX-ABE7.10-CDA-nCas9

GTGATGTCAAAGCTTGAAAAAACGCACGTAACAAAAGCAAAATTTATGCT  
CCATGGGGGAGACTACAACCCCGATCAGTGGCTGGATCGGCCCCGATATTT  
TAGCTGACGATATCAAACCTGATGAAGCTTTCTCATAACGAATACGTTTTCTG  
TCGGCATTTTTGCATGGAGCGCACTTGAGCCGGAGGAGGGGCGTATATCAA  
TTTGAATGGCTGGATGATATTTTTGAGCGGATTCACAGTATAGGCGGCCG  
GGTCATATTAGCAACGCCGAGCGGAGCCCGTCCGGCCTGGCTGTCGCAAA  
CCTATCCGGAAGTTTTGCGCGTCAATGCCTCCCGCGTCAAACAGCTGCAC  
GGCGGAAGGCACAACCACTGCCTCACATCTAAAGTCTACCGAGAAAAAA  
CACGGCACATCAACCGCTTATTAGCAGAACGATACGGACATCACCCGGCG  
CTGTTAATGTGGCACATTTCAAACGAATACGGGGGAGATTGCCACTGTGA  
TTTATGCCAGCATGCTTTCCGGGAGTGGCTGAAATCGAAATATGACAACA  
GCCTCAAGACATTGAACCATGCGTGGTGGACCCCTTTTTGGAGCCATACG  
TTCAATGACTGGTCACAAATTGAAAGCCCTTCGCCGATCGGTGAAAATGG  
CTTGATGGCCTGAATTTAGATTGGCGCCGGTTCGTCACCGATCAAACGAT  
TTCGTTTTATGAAAATGAAATCATTCCGCTGAAAGAATTGACGCCTGATAT  
CCCTATCACAACGAATTTTATGGCTGACACACCGGATTTGATCCCGTATAC  
CGTTCGTATAGCATAATTATACGAAGTTATGCCATAGTGACTGGCGATG  
CTGTCGGAATGGACGACGGCAATAGTTACCCTTATTATCAAGATAAGAAA  
GAAAAGGATTTTTCGCTACGCTCAAATCCTTTAAAAAAACACAAAAGACC  
ACATTTTTTAATGTGGTCTTTTATTCTTCAACTAAAGCACCCATTAGTTCAA  
CAAACGAAAATTGGATAAAGTGGGATATTTTTAAATATATATTTATGTTA  
CAGTAATATTGACTTTTTAAAAAAGGATTGATTCTAATGAAGAAAGCAGAC  
AAGTAAGCCTCCTAAATTCACCTTAGATAAAAATTTAGGAGGCATATCAA  
ATGAACCTTAATAAAAATTGATTTAGACAATTGGAAGAGAAAAGAGATATT  
TAATCATTATTTGAACCAACAAACGACTTTTAGTATAACCACAGAAATTG  
ATATTAGTGTTTTATACCGAAACATAAAACAAGAAGGATATAAATTTTAC  
CCTGCATTTATTTCTTAGTGACAAGGGTGATAAACTCAAATACAGCTTTT

AGAACTGGTTACAATAGCGACGGAGAGTTAGGTTATTGGGATAAGTTAGA  
GCCACTTTATAACAATTTTTGATGGTGTATCTAAAACATTCTCTGGTATTTG  
GACTCCTGTAAAGAATGACTTCAAAGAGTTTTATGATTTATACCTTTCTGA  
TGTAGAGAAATATAATGGTTCGGGGAAATTGTTTCCCAAACACCTATAC  
CTGAAAATGCTTTTTCTCTTTCTATTATTCCATGGACTTCATTTACTGGGTT  
TAACTTAAATATCAATAATAATAGTAATTACCTTCTACCCATTATTACAGC  
AGGAAAATTCATTAATAAAGGTAATTCAATATATTTACCGCTATCTTTACA  
GGTACATCATTCTGTTTGTGATGGTTATCATGCAGGATTGTTTATGAACTC  
TATTCAGGAATTGTCAGATAGGCCTAATGACTGGCTTTTATAATATGAGAT  
AATGCCGACTGTACTTTTTACAGTCGGTTTTCTAAAACGATACATTAATAG  
GTACGAAAAAGCAACTTTTTTTGCGCTTAAAACCAGTCATACCAATAAAT  
AACTTCGTATAGCATAACATTATACGAACGGTATTCAGAACGCTCGGTTGC  
CGCCGGGCGTTTTTTATGCAGCAATGGCAAGAACGTCCCGGGGAGCTCCT  
AACTTATAGGGGTAACTTAAAAAAGAATCAATAACGATAGAAACCGCT  
CCTAAAGCAGGTGCATTTTTTCTAACGAAGAAGGCAATAGTTCACATTT  
ATTGTCTAAATGAGAATGGACTCTAGAAGAACTTCGTTTTTAATCGTATT  
TAAAACAATGGGATGAGATTCAATTATATGATTTCTCAAGATAACAGCTT  
CTATATCAAATGTATTAAGGATATTGGTTAATCCAATTCCGATATAAAAGC  
CAAAGTTTTGAAGTGCATTTAACATTTCTACATCATTTTTATTTGCGCGTTC  
CACAATCTCTTTTCGAGAAATATTCTTTTCTTCTTTAGAGAGCGAAGCCAG  
TAACGCTTTTTTCAGAAGCATATAATTCCCAACAGCCTCGATTTCCACAGCT  
GCATTTGGGTCCATTAATAATCTATCGTCATATGACCCATTTCCCCAGAAAA  
ACCCTGAACACCTTTATAACAATTCGTTGTTAATAACAAGTCCAGTTCCAAT  
TCCGATATTAATACTGATGTAAACGATGTTTTTCATAGTTTTTTGTCATACC  
AAATACTTTTTACCGTATGCTCCTGCATTAGCTTCATTTTCAACAAAAAC  
CGGAACATTAAACTCACTCTCAATTAAAAACGCAAATCTTTGATATTCCA  
ATTTAAGTTAGGCATGAAAATAATTTGCTGATGACGATCTACAAGGCCTG  
GAACACAAATTCCTATTCCGACTAGACCATAAGGGGACTCAGGCATATGG  
GTTACAAAACCATGAATAAGTGCAAATAAAATCTCTTTTACTTCACTAGC  
GGAAGAACTAGACAAGTCAGAAGTCTTCTCGAGAATAATATTTCTTCTA  
AGTCGGTTAGAATTCCGTTAAGATAGTCGACTCCTATATCAATACCAATCG  
AGTAGCCTGCATTCTTATTA AAAACAAGCATTACAGGTCTTCTGCCGCCTC  
TAGATTGCCCTGCCCAATTTCAAAAATAAAATCTTTTTCAAGCAGTGTAT  
TACTTGAGAGGAGACAGTAGACTTGTTTAATCCTGTAATCTCAGAGAGA  
GTTGCCCTGGAGACAGGGGAGTTCTTCAAAATTTTCATCTAATATTAATTTT  
TGATTCATTTTTTTTACTAAAGCTTGATCTGCAATTTGAATAATAACCACTC  
CTTTGTTTATCCACCGAACTAAGTTGGTGTTTTTTTGAAGCTTGAATTAGAT  
ATTTAAAAGTATCATATCTAATATTATAACTAAATTTTCTAAAAAAAACAT  
TGAAATAAACATTTATTTTTGTATATGATGAGATAAAGTTAGTTTATTGGAT  
AACAAACTAACTCAATTAAGATAGTTGATGGATAAACTTGTTCACTTAA  
ATCAAAGGGGGAAATGACAAATGGTCCAACTAGTGATATCTAAAAATC  
AAAGGGGGAAATGGGATCCATGAGCGAAGTTGAATTCAGCCACGAGTAC  
TGGATGAGACATGCTCTGACACTGGCCAAACGCGCTTGGGACGAAAGAG  
AAGTCCCGGTTCGGAGCTGTTCTGGTCCACAATAATCGCGTCATCGGCGAG

GGCTGGAATCGCCCGATTGGAAGACATGACCCAACGGCCCACGCTGAAAT  
CATGGCTCTTAGACAAGGCGGACTTGTTATGCAGAACTACCGCCTTATTG  
ACGCTACGCTGTACGTCACACTGGAACCGTGTGTTATGTGTGCCGGAGCC  
ATGATCCACTCCCGCATTGGCCGCGTCGTTTTTTGGAGCCCGCGATGCCAAA  
ACGGGCGCTGCCGGAAGCCTTATGGATGTCCTTACCACCCGGGAATGAA  
TCATAGAGTTGAGATCACGGAGGGCATTCTTGCCGACGAATGTGCCGCC  
TTCTGTCCGATTTTTTCCGCATGCGCCGCCAAGAAATCAAGGCCCAAAG  
AAAGCCCAGAGCAGCACGGATTCCGGCGGTTCCAGTGGTGGATCCTCTGG  
ATCTGAGACACCTGGAACGTCTGAATCTGCTACACCAGAATCTTCTGGAG  
GATCTTCTGGTGGCTCCAGCGAAGTCGAGTTCTCCACGAATACTGGATG  
CGCCATGCCCTTACACTTGCCAAACGCGCTCGCGATGAACGCGAAGTCCC  
AGTTGGCGCCGTTCTTGTTCTTAACAACCGCGTCATCGGAGAAGGCTGGA  
ACCGCGCTATCGGACTTCATGATCCGACAGCTCATGCCGAAATTATGGCT  
CTGCGCCAAGGCGGACTTGTCATGCAGAATTACAGACTTATTGATGCCAC  
GCTTTACGTCACGTTTGAACCGTGCATGTGCGCCGGCGCCATGATTCA  
TAGCCGCATCGGCAGAGTTGTCTTCGGCGTCCGCAATGCTAAAACGGGCG  
CCGCCGGCTCCCTTATGGACGTCCTTCAATACCCGGGCATGAATCACCGCG  
TTGAAATCACAGAAGGCATTCTGGCCGATGAGTGCGCCGCTCTGCTGTGC  
TACTTCTCAGAATGCCGAGACAAGTCTTCAACGCCCAGAAGAAAGCCCA  
AAGCAGCACAGACTCTGGAGGATCATCCGGAGGCAGCTCTGGAAGTGAA  
ACACCAGGAACAAGCGAATCAGCTACACCAGAGTCCTCTGGAGGCTCATC  
TGGAGGAAGCACAGATGCCGAATACGTTTCGCATCCACGAGAAGCTGGAT  
ATCTACACGTTTAAAAGCAGTTTTTTAACAATAAGAAGAGCGTCTCCCA  
CCGCTGCTATGTTCTTTTTCGAACTGAAACGCAGAGGCGAAAGACGCGCTT  
GCTTCTGGGGATATGCCGTTAACAACCGCAGTCCGGCACGGAACGCGGC  
ATTCACGCCGAGATCTTCAGCATCCGCAAGGTTGAGGAGTATCTTCGCGA  
TAACCCGGGCCAGTTTACGATCAACTGGTACAGCAGCTGGAGCCCGTGTG  
CCGATTGCGCCGAAAAGATTCTTGAGTGGTACAACCAAGAAGTTCGCGGC  
AATGGCCACACGCTGAAAATCTGGGCTTGCAAGCTGTACTACGAGAAGAA  
CGCCCGCAATCAGATCGGACTTTGGAATCTTCGCGATAATGGCGTTGGAC  
TTAACGTCATGGTCTCCGAACACTACCAGTGCTGCCGCAAGATCTTCATCC  
AGTCCTCCCACAACCAGCTTAACGAAAACCGCTGGCTGGAGAAGACACTG  
AAACGCGCTGAAAAGCGCCGCTCCGAGCTGAGCATCATGATCCAAGTTAA  
GATTCTTCATACGACGAAGAGCCCGCCGTCTCAGGTTCTGAAACTCCTG  
GAACCAGTGAGTCTGCAACTCCAGAGTCTATGGATAAGAAATACTCAATA  
GGCTTAGCTATCGGCACAAATAGCGTCGGATGGGCGGTGATCACTGATGA  
ATATAAGGTTCCGTCTAAAAAGTTCAAGGTTCTGGGAAATACAGACCGCC  
ACAGTATCAAAAAAATCTTATAGGGGCTTTTTATTTGACAGTGGAGAG  
ACAGCGGAAGCGACTCGTCTCAAACGGACAGCTCGTAGAAGGTATACAC  
GTCGGAAGAATCGTATTTGTTATCTACAGGAGATTTTTTCAAATGAGATGG  
CGAAAGTAGATGATAGTTTCTTTCATCGACTTGAAGAGTCTTTTTTGGTGG  
AAGAAGACAAGAAGCATGAACGTCATCCTATTTTTGGAAATATAGTAGAT  
GAAGTTGCTTATCATGAGAAATATCCAATCTATCATCTGCGAAAAAA  
ATTGGTAGATTCTACTGATAAAGCGGATTTGCGCTTAATCTATTTGGCCTT



AGCGCATATGATTAAGTTTCGTGGTCATTTTTTGATTGAGGGAGATTTAAA  
TCCTGATAATAGTGATGTGGACAACTATTTATCCAGTTGGTACAAACCTA  
CAATCAATTATTTGAAGAAAACCCTATTAACGCAAGTGGAGTAGATGCTA  
AAGCGATTCTTTCTGCACGATTGAGTAAATCAAGACGATTAGAAAATCTC  
ATTGCTCAGCTCCCCGGTGAGAAGAAAAATGGCTTATTTGGGAATCTCAT  
TGCTTTGTCATTGGGTTTGACCCCTAATTTTAAATCAAATTTTGATTTGGCA  
GAAGATGCTAAATTACAGCTTTCAAAGATACTTACGATGATGATTTAGA  
TAATTTATTGGCGCAAATTGGAGATCAATATGCTGATTTGTTTTGGCAGC  
TAAGAATTTATCAGATGCTATTTACTTTTCAGATATCCTAAGAGTAAATAC  
TGAAATAACTAAGGCTCCCCTATCAGCTTCAATGATTAACGCTACGATG  
AACATCATCAAGACTTGACTCTTTTAAAAGCTTTAGTTTCGACAACAACCTC  
CAGAAAAGTATAAAGAAATCTTTTTTGATCAATCAAAAAACGGATATGCA  
GGTTATATTGATGGGGGAGCTAGCCAAGAAGAATTTTATAAATTTATCAA  
ACCAATTTTAGAAAAAATGGATGGTACTGAGGAATTATTGGTGAAACTAA  
ATCGTGAAGATTTGCTGCGCAAGCAACGGACCTTTGACAACGGCTCTATT  
CCCCATCAAATTCACTTGGGTGAGCTGCATGCTATTTTGAGAAGACAAGA  
AGACTTTTATCCATTTTAAAAGACAATCGTGAGAAGATTGAAAAAATCTT  
GACTTTTCGAATTCCTTATTATGTTGGTCCATTGGCGCGTGGCAATAGTCG  
TTTTGCATGGATGACTCGGAAGTCTGAAGAAACAATTACCCCATGGAATT  
TTGAAGAAGTTGTCGATAAAGGTGCTTCAGCTCAATCATTATTGAACGCA  
TGACAACTTTGATAAAAAATCTTCCAATGAAAAAGTACTACCAAACAT  
AGTTTGCTTTATGAGTATTTTACGGTTTATAACGAATTGACAAAGGTCAA  
TATGTTACTGAAGGAATGCGAAAACCAGCATTTCCTTTCAGGTGAACAGAA  
GAAAGCCATTGTTGATTTACTCTTCAAACAAATCGAAAAGTAACCGTTA  
AGCAATTAAGAAGATTATTTCAAAAAAATAGAATGTTTTGATAGTGTT  
GAAATTCAGGAGTTGAAGATAGATTTAATGCTTCATTAGGTACCTACCAT  
GATTTGCTAAAAATTATTAAGATAAAGATTTTTTTGGATAATGAAGAAAA  
TGAAGATATCTTAGAGGATATTGTTTTAACATTGACCTTATTTGAAGATAG  
GGAGATGATTGAGGAAAGACTTAAACATATGCTCACCTCTTTGATGATA  
AGGTGATGAAACAGCTTAAACGTCGCCGTTATACTGGTTGGGGACGTTTG  
TCTCGAAAATTGATTAATGGTATTAGGGATAAGCAATCTGGCAAAACAAT  
ATTAGATTTTTTGAAATCAGATGGTTTTGCCAATCGCAATTTTATGCAGCT  
GATCCATGATGATAGTTTGACATTTAAGAAGACATTCAAAAGCACAAG  
TGTCTGGACAAGGCGATAGTTTACATGAACATATTGCAAATTTAGCTGGT  
AGCCCTGCTATTA AAAAAGGTATTTTACAGACTGTAAAAGTTGTTGATGA  
ATTGGTCAAAGTAATGGGGCGGCATAAGCCAGAAAATATCGTTATTGAAA  
TGGCACGTGAAAATCAGACAACCTCAAAGGGCCAGAAAATTCGCGAGA  
GCGTATGAAACGAATCGAAGAAGGTATCAAAGAATTAGGAAGTCAGATT  
CTTAAAGAGCATCCTGTTGAAAATACTCAATTGCAAAATGAAAAGCTCTA  
TCTCTATTATCTCCAAAATGGAAGAGACATGTATGTGGACCAAGAATTAG  
ATATTAATCGTTTAAAGTGATTATGATGTCGATCACATTGTTCCACAAAGTT  
TCCTTAAAGACGATTCAATAGACAATAAGGTCTTAACGCGTTCTGATAAA  
AATCGTGGTAAATCGGATAACGTTCCAAGTGAAGAAGTAGTCAAAAAGAT  
GAAAAACTATTGGAGACAACCTTCTAAACGCCAAGTTAATCACTCAACGTA

AGTTTGATAATTTAACGAAAGCTGAACGTGGAGGTTTGAGTGAACCTTGAT  
AAAGCTGGTTTTATCAAACGCCAATTGGTTGAAACTCGCCAAATCACTAA  
GCATGTGGCACAAATTTTGGATAGTCGCATGAATACTAAATACGATGAAA  
ATGATAAACTTATTCGAGAGGTTAAAGTGATTACCTTAAAATCTAAATTA  
GTTTCTGACTTCCGAAAAGATTTCCAATTCTATAAAGTACGTGAGATTAAC  
AATTACCATCATGCCCATGATGCGTATCTAAATGCCGTCGTTGGAACCTGCT  
TTGATTAAGAAATATCCAAAACCTTGAATCGGAGTTTGTCTATGGTGATTAT  
AAAGTTTATGATGTTTCGTAAAATGATTGCTAAGTCTGAGCAAGAAATAGG  
CAAAGCAACCGCAAATATTTCTTTTACTCTAATATCATGAACTTCTTCAA  
AACAGAAATTACACTTGCAAATGGAGAGATTCGCAAACGCCCTCTAATCG  
AAACTAATGGGGAAACTGGAGAAATTGTCTGGGATAAAGGGCGAGATTTT  
GCCACAGTGCGCAAAGTATTGTCCATGCCCAAGTCAATATTGTCAAGAA  
AACAGAAGTACAGACAGGCGGATTCTCCAAGGAGTCAATTTTACCAAAAA  
GAAATTCGGACAAGCTTATTGCTCGTAAAAAAGACTGGGATCCAAAAAAA  
TATGGTGGTTTTGATAGTCCAACGGTAGCTTATTCAGTCCTAGTGGTTGCT  
AAGGTGAAAAAGGGAAATCGAAGAAGTTAAAATCCGTTAAAGAGTTAC  
TAGGGATCACAATTATGGAAAGAAGTTCCTTTGAAAAAATCCGATTGAC  
TTTTTAGAAGCTAAAGGATATAAGGAAGTTAAAAAAGACTTAATCATTAA  
ACTACCTAAATATAGTCTTTTTGAGTTAGAAAACGGTCGTAAACGGATGCT  
GGCTAGTGCCGGAGAATTACAAAAGGAAATGAGCTGGCTCTGCCAAGC  
AAATATGTGAATTTTTTATATTTAGCTAGTCATTATGAAAAGTTGAAGGGT  
AGTCCAGAAGATAACGAACAAAAACAATTGTTTGTGGAGCAGCATAAGC  
ATTATTTAGATGAGATTATTGAGCAAATCAGTGAATTTTCTAAGCGTGTTA  
TTTTAGCAGATGCCAATTTAGATAAAGTTCTTAGTGCATATAACAAACATA  
GAGACAAACCAATACGTGAACAAGCAGAAAATATTATTCATTTATTTACG  
TTGACGAATCTTGGAGCTCCCGCTGCTTTTAAATATTTTGATACAACAATT  
GATCGTAAACGATATACGTCTACAAAAGAAGTTTTAGATGCCACTCTTAT  
CCATCAATCCATCACTGGTCTTTATGAAACACGCATTGATTTGAGTCAGCT  
AGGAGGTGACTAACTCGAGTAAGGATCTCCAGGCATCAAATAAACGAA  
AGGCTCAGTCGAAAGACTGGGCCTTTCGTTTTATCTGTTGTTTGTCCGGTGA  
ACGCTCTCTACTAGAGTCACTGGCTCACCTTCGGGTGGGCCTTCTGCG  
TTTATACCTAGGGATATATTCCGCTTCCTCGCTCACTGCAGCGTCATCACG  
AAAGAACAAGACTTTTCACCATATAAACTGCTGATCGTCCCGATGCTGTA  
TTAATCAGCGAGGACACCGTTTCCCGTTTAAAAGCGTTTACGGCTGACG  
GCCGCACCTTAGTCATGACGTATATCAGCGGGGTTGTGAATGAGCATGAC  
TTAACATACACAGGCGGATGGCATCCGGATCTTCAAGCTATATTTGGAGT  
TGAGCCTCTTGAAACGGACACCCTGTATCCGAAGGATCGAAACGCTGTCA  
GCTACCGCAGCCAAATATATGAAATGAAGGATTATGCAACCGTGATTGAT  
GTAAAGACAGCTTCAGTGGAAGCGGTGTATCAAGAAGATTTTTATGCGCG  
CACGCCAGCGGTCACAAGCCATGAGTATCAGCAGGGCAAGGCGTATTTTA  
TCGGCGCGGTTTTGGAGGATCAATTTTACGCGTGATTTCTATGAGGGTCTGA  
TCACAGACCTGTCTCTCTCTCCAGTTTTTCCGGTTCGGCACGGAAAAGGCG  
TCTCCGTACAAGCGAGGCAGGATCAGGACAATGATTATATTTTTGTCATG  
AATTTACGGAAGAAAAACAGCTGGTCACGTTTGATCAGAGTGTGAAGGA

CATAATGACAGGAGACATATTGTCAGGCGACCTGACGATGGAAAAGTATG  
AAGTGAGAATTGTCGTAAACACACATTAG

pAX-CDA-ABE7.10-nCas9

GTGATGTCAAAGCTTGAAAAACGCACGTAACAAAAGCAAATTTATGCT  
CCATGGGGGAGACTACAACCCCGATCAGTGGCTGGATCGGCCCGATATTT  
TAGCTGACGATATCAAACCTGATGAAGCTTTCTCATAACGAATACGTTTTCTG  
TCGGCATTTTTGCATGGAGCGCACTTGAGCCGGAGGAGGGGCGTATATCAA  
TTTGAATGGCTGGATGATATTTTTGAGCGGATTCACAGTATAGGCGGCCG  
GGTCATATTAGCAACGCCGAGCGGAGCCCGTCCGGCCTGGCTGTCGCAAA  
CCTATCCGGAAGTTTTGCGCGTCAATGCCTCCCGCGTCAAACAGCTGCAC  
GGCGGAAGGCACAACCACTGCCTCACATCTAAAGTCTACCGAGAAAAAA  
CACGGCACATCAACCGCTTATTAGCAGAACGATACGGACATCACCCGGCG  
CTGTTAATGTGGCACATTTCAAACGAATACGGGGGAGATTGCCACTGTGA  
TTTATGCCAGCATGCTTTCCGGGAGTGGCTGAAATCGAAATATGACAACA  
GCCTCAAGACATTGAACCATGCGTGGTGGACCCCTTTTTGGAGCCATACG  
TTCAATGACTGGTCACAAATTGAAAGCCCTTCGCCGATCGGTGAAAATGG  
CTTGCATGGCCTGAATTTAGATTGGCGCCGGTTCGTCACCGATCAAACGAT  
TTCGTTTTATGAAAATGAAATCATTCCGCTGAAAGAATTGACGCCTGATAT  
CCCTATCACAACGAATTTTATGGCTGACACACCGGATTTGATCCCGTATAC  
CGTTCGTATAGCATAATTATACGAAGTTATGCCATAGTGACTGGCGATG  
CTGTCGGAATGGACGACGGCAATAGTTACCCTTATTATCAAGATAAGAAA  
GAAAAGGATTTTTCGCTACGCTCAAATCCTTTAAAAAACACAAAAGACC  
ACATTTTTTAATGTGGTCTTTTATTCTTCAACTAAAGCACCCATTAGTTCAA  
CAAACGAAAATTGGATAAAGTGGGATATTTTTAAATATATATTTATGTTA  
CAGTAATATTGACTTTTTAAAAAGGATTGATTCTAATGAAGAAAGCAGAC  
AAGTAAGCCTCCTAAATTCACCTTAGATAAAAATTTAGGAGGCATATCAA  
ATGAACCTTAATAAAATTGATTTAGACAATTGGAAGAGAAAAGAGATATT  
TAATCATTATTTGAACCAACAAACGACTTTTAGTATAACCACAGAAATTG  
ATATTAGTGTTTTATACCGAAACATAAAACAAGAAGGATATAAATTTTAC  
CCTGCATTTATTTCTTAGTGACAAGGGTGATAAACTCAAATACAGCTTTT  
AGAACTGGTTACAATAGCGACGGAGAGTTAGGTTATTGGGATAAGTTAGA  
GCCACTTTATACAATTTTTGATGGTGTATCTAAAACATTCTCTGGTATTTG  
GACTCCTGTAAAGAATGACTTCAAAGAGTTTTATGATTTATACCTTTCTGA  
TGTAGAGAAATATAATGGTTCGGGGAAATTGTTTCCCAAACACCTATAC  
CTGAAAATGCTTTTTCTCTTTCTATTATTCCATGGACTTCATTTACTGGGT  
TAACTTAAATATCAATAATAATAGTAATTACCTTCTACCCATTATTACAGC  
AGGAAAATTCATTAATAAAGGTAATTCAATATATTTACCGCTATCTTTACA  
GGTACATCATTCTGTTTGTGATGGTTATCATGCAGGATTGTTTATGAACTC  
TATTCAGGAATTGTCAGATAGGCCTAATGACTGGCTTTTATAATATGAGAT  
AATGCCGACTGTACTTTTTACAGTCGGTTTTCTAAAACGATACATTAATAG  
GTACGAAAAGCAACTTTTTTTGCGCTTAAAACCAGTCATACCAATAAAT  
AACTTCGTATAGCATAATTATACGAACGGTATTCAGAACGCTCGGTTGC  
CGCCGGGCGTTTTTTTATGCAGCAATGGCAAGAACGTCCCGGGGAGCTCCT

AACTTATAGGGGTAACACTTAAAAAAGAATCAATAACGATAGAAACCGCT  
CCTAAAGCAGGTGCATTTTTTCCTAACGAAGAAGGCAATAGTTCACATTT  
ATTGTCTAAATGAGAATGGACTCTAGAAGAACTTCGTTTTTAATCGTATT  
TAAAACAATGGGATGAGATTCAATTATATGATTTCTCAAGATAACAGCTT  
CTATATCAAATGTATTAAGGATATTGGTTAATCCAATTCCGATATAAAAGC  
CAAAGTTTTGAAGTGCATTTAACATTTCTACATCATTTTTTATTTGCGCGTTC  
CACAATCTCTTTTCGAGAAATATTCTTTTCTTCTTTAGAGAGCGAAGCCAG  
TAACGCTTTTTTCAGAAGCATATAATTCCCAACAGCCTCGATTTCCACAGCT  
GCATTTGGGTCCATTAAAATCTATCGTCATATGACCCATTTCCCCAGAAAA  
ACCCTGAACACCTTTATACAATTCGTTGTTAATAACAAGTCCAGTTCCAAT  
TCCGATATTAATACTGATGTAAACGATGTTTTTCATAGTTTTTTTGTCCATACC  
AAATACTTTTTACCGTATGCTCCTGCATTAGCTTCATTTTTCAACAAAAAC  
CGGAACATTAAACTCACTCTCAATTA AAAACTGCAAATCTTTGATATTCCA  
ATTTAAGTTAGGCATGAAAATAATTTGCTGATGACGATCTACAAGGCCTG  
GAACACAAATTCCTATTCCGACTAGACCATAAGGGGACTCAGGCATATGG  
GTTACAAAACCATGAATAAGTGCAAATAAAATCTCTTTTACTTCACTAGC  
GGAAGAACTAGACAAGTCAGAAGTCTTCTCGAGAATAATATTTCTTCTA  
AGTCGGTTAGAATTCCGTTAAGATAGTCGACTCCTATATCAATACCAATCG  
AGTAGCCTGCATTCTTATTA AAAACAAGCATTACAGGTCTTCTGCCGCCTC  
TAGATTGCCCTGCCCAATTTCAAAAATAAAATCTTTTTCAAGCAGTGTAT  
TACTTGAGAGGAGACAGTAGACTTGTTTAATCCTGTAATCTCAGAGAGA  
GTTGCCCTGGAGACAGGGGAGTTCTTCAAAATTTTCATCTAATATTAATTTT  
TGATTCATTTTTTTTACTAAAGCTTGATCTGCAATTTGAATAATAACCACTC  
CTTTGTTTATCCACCGAACTAAGTTGGTGTTTTTTTGAAGCTTGAATTAGAT  
ATTTAAAAGTATCATATCTAATATTATAACTAAATTTTCTAAAAAAAACAT  
TGAAATAAACATTTATTTTGTATATGATGAGATAAAGTTAGTTTATTGGAT  
AAACAACTAACTCAATTAAGATAGTTGATGGATAAACTTGTTCACTTAA  
ATCAAAGGGGGAAATGACAAATGGTCCAACTAGTGATATCTAAAAATC  
AAAGGGGGAAATGGGATCCATGACAGATGCCGAATACGTTTCGCATCCAC  
GAGAAGCTGGATATCTACACGTTTAAAAGCAGTTTTTTTAAACAATAAGAA  
GAGCGTCTCCACCGCTGCTATGTTCTTTTTCGAACTGAAACGCAGAGGCG  
AAAGACGCGCTTGCTTCTGGGGATATGCCGTTAACAAACCGCAGTCCGGC  
ACGGAACGCGGCATTCACGCCGAGATCTTCAGCATCCGCAAGGTTGAGGA  
GTATCTTCGCGATAACCCGGGCCAGTTTACGATCAACTGGTACAGCAGCT  
GGAGCCCGTGTGCCGATTGCGCCGAAAAGATTCTTGAGTGGTACAACCAA  
GAACTTCGCGGCAATGGCCACACGCTGAAAATCTGGGCTTGCAAGCTGTA  
CTACGAGAAGAACGCCCGCAATCAGATCGGACTTTGGAATCTTCGCGATA  
ATGGCGTTGGACTTAACGTCATGGTCTCCGAACACTACCAGTGCTGCCGC  
AAGATCTTCATCCAGTCTCCACAACCAGCTTAACGAAAACCGCTGGCT  
GGAGAAGACACTGAAACGCGCTGAAAAGCGCCGCTCCGAGCTGAGCATC  
ATGATCCAAGTTAAGATTCTTCATACGACGAAGAGCCCGGCCGTCTCAGG  
TTCTGAAACTCCTGGAACCAGTGAGTCTGCAACTCCAGAGTCTAGCGAAG  
TTGAATTCAGCCACGAGTACTGGATGAGACATGCTCTGACACTGGCCAAA  
CGCGCTTGGGACGAAAGAGAAGTCCCGGTCGGAGCTGTTCTGGTCCACAA

TAATCGCGTCATCGGGCAGGGGCTGGAATCGCCCGATTGGAAGACATGACC  
CAACGGCCCACGCTGAAATCATGGCTCTTAGACAAGGCGGACTTGTTATG  
CAGA ACTACCGCCTTATTGACGCTACGCTGTACGT CACACTGGAACCGTG  
TGTTATGTGTGCCGGAGCCATGATCCACTCCCGCATTGGCCGCGTCGTTTT  
TGGAGCCCGCGATGCCAAAACGGGCGCTGCCGGAAGCCTTATGGATGTCC  
TTCACCACCCGGGAATGAATCATAGAGTTGAGATCACGGAGGGCATTCTT  
GCCGACGAATGTGCCGCCCTTCTGTCCGATTTTTTCCGCATGCGCCGCCAA  
GAAATCAAGGCCCAAAGAAAGGCCAGAGCAGCACGGATTCCGGCGGTT  
CCAGTGGTGGATCCTCTGGATCTGAGACACCTGGAACGTCTGAATCTGCT  
ACACCAGAATCTTCTGGAGGATCTTCTGGTGGCTCCAGCGAAGTCGAGTT  
CTCCACGAATACTGGATGCGCCATGCCCTTACACTTGCCAAACGCGCTC  
GCGATGAACGCGAAGTCCCAGTTGGCGCCGTTCTTGTTCTTAACAACCGC  
GTCATCGGAGAAGGCTGGAACCGCGCTATCGGACTTCATGATCCGACAGC  
TCATGCCGAAATTATGGCTCTGCGCCAAGGCGGACTTGTCATGCAGAATT  
ACAGACTTATTGATGCCACGCTTTACGT CACGTT CGAACCGTGCGTCATGT  
GCGCCGGCGCCATGATTCATAGCCGCATCGGCAGAGTTGTCTTCGGCGTC  
CGCAATGCTAAAACGGGCGCCGCCGGCTCCCTTATGGACGTCCTTCATTA  
CCCGGGCATGAATCACCGCGTTGAAATCACAGAAGGCATTCTGGCCGATG  
AGTGCGCCGCTCTGCTGTGCTACTTCTTCAGAATGCCGAGACAAGTCTTCA  
ACGCCCAGAAGAAAGCCCAAAGCAGCACAGACTCTGGAGGATCATCCGG  
AGGCAGCTCTGGAAGTGAAACACCAGGAACAAGCGAATCAGCTACACCA  
GAGTCCTCTGGAGGCTCATCTGGAGGAAGCGATAAGAAATACTCAATAGG  
CTTAGCTATCGGCACAAATAGCGTCGGATGGGCGGTGATCACTGATGAAT  
ATAAGGTTCCGTCTAAAAAGTTCAAGGTTCTGGGAAATACAGACCGCCAC  
AGTATCAAAAAAATCTTATAGGGGCTCTTTTATTTGACAGTGGAGAGAC  
AGCGGAAGCGACTCGTCTCAAACGGACAGCTCGTAGAAGGTATACACGTC  
GGAAGAATCGTATTTGTTATCTACAGGAGATTTTTTCAAATGAGATGGCG  
AAAGTAGATGATAGTTTCTTTCATCGACTTGAAGAGTCTTTTTTGGTGGAA  
GAAGACAAGAAGCATGAACGTCATCCTATTTTTGGAAATATAGTAGATGA  
AGTTGCTTATCATGAGAAATATCCA ACTATCTATCATCTGCGAAAAAATT  
GGTAGATTCTACTGATAAAGCGGATTTGCGCTTAATCTATTTGGCCTTAGC  
GCATATGATTAAGTTTCGTGGTCATTTTTTGATTGAGGGAGATTTAAATCC  
TGATAATAGTGATGTGGACAACTATTTATCCAGTTGGTACAAACCTACA  
ATCAATTATTTGAAGAAAACCCTATTAACGCAAGTGGAGTAGATGCTAAA  
GCGATTCTTTCTGCACGATTGAGTAAATCAAGACGATTAGAAAATCTCATT  
GCTCAGCTCCCCGGTGAGAAGAAAAATGGCTTATTTGGGAATCTCATTGC  
TTTGTCATTGGGTTTGACCCCTAATTTTAAATCAAATTTTGATTTGGCAGA  
AGATGCTAAATTACAGCTTTCAAAGATACTTACGATGATGATTTAGATA  
ATTTATTGGCGCAAATTGGAGATCAATATGCTGATTTGTTTTTGGCAGCTA  
AGAATTTATCAGATGCTATTTTACTTTCAGATATCCTAAGAGTAAATACTG  
AAATAACTAAGGCTCCCCTATCAGCTTCAATGATTAACGCTACGATGAA  
CATCATCAAGACTTGACTCTTTTAAAAGCTTTAGTTTCGACAACA ACTTCCA  
GAAAAGTATAAAGAAATCTTTTTTGATCAATCAAAAAACGGATATGCAGG  
TTATATTGATGGGGGAGCTAGCCAAGAAGAATTTTATAAATTTATCAAAC

CAATTTTAGAAAAAATGGATGGTACTGAGGAATTATTGGTGAAACTAAAT  
CGTGAAGATTTGCTGCGCAAGCAACGGACCTTTGACAACGGCTCTATTCC  
CCATCAAATTCACCTGGGTGAGCTGCATGCTATTTTGAGAAGACAAGAAG  
ACTTTTATCCATTTTAAAAGACAATCGTGAGAAGATTGAAAAAATCTTGA  
CTTTTCGAATTCCTTATTATGTTGGTCCATTGGCGCGTGGCAATAGTCGTTT  
TGCATGGATGACTCGGAAGTCTGAAGAAACAATTACCCCATGGAATTTTG  
AAGAAGTTGTCGATAAAGGTGCTTCAGCTCAATCATTTATTGAACGCATG  
ACAAACTTTGATAAAAAATCTTCCAAATGAAAAAGTACTACCAAACATAG  
TTTGCTTTATGAGTATTTTACGGTTTATAACGAATTGACAAAGGTCAAATA  
TGTTACTGAAGGAATGCGAAAACCAGCATTTCCTTTCAGGTGAACAGAAGA  
AAGCCATTGTTGATTTACTCTTCAAACAAATCGAAAAGTAACCGTTAAG  
CAATTAAGAAGATTATTTCAAAAAAATAGAATGTTTTGATAGTGTTGA  
AATTCAGGAGTTGAAGATAGATTTAATGCTTCATTAGGTACCTACCATGA  
TTTGCTAAAATTATTAAGATAAAGATTTTTTGGATAATGAAGAAAATG  
AAGATATCTTAGAGGATATTGTTTTAACATTGACCTTATTTGAAGATAGGG  
AGATGATTGAGGAAAGACTTAAACATATGCTCACCTCTTTGATGATAAG  
GTGATGAAACAGCTTAAACGTCGCCGTTATACTGGTTGGGGACGTTTGTCT  
CGAAAATTGATTAATGGTATTAGGGATAAGCAATCTGGCAAACAATATT  
AGATTTTTTGAAATCAGATGGTTTTGCCAATCGCAATTTTATGCAGCTGAT  
CCATGATGATAGTTTGACATTTAAGAAGACATTCAAAAGCACAAGTGT  
CTGGACAAGGCGATAGTTTACATGAACATATTGCAAATTTAGCTGGTAGC  
CCTGCTATTA AAAAAGGTATTTTACAGACTGTAAAAGTTGTTGATGAATTG  
GTCAAAGTAATGGGGCGGCATAAGCCAGAAAATATCGTTATTGAAATGGC  
ACGTGAAAATCAGACA ACTCAAAGGGCCAGAAAATTCGCGAGAGCGT  
ATGAAACGAATCGAAGAAGGTATCAAAGAATTAGGAAGTCAGATTCTTAA  
AGAGCATCCTGTTGAAAATACTCAATTGCAAATGAAAAGCTCTATCTCT  
ATTATCTCAA AATGGAAGAGACATGTATGTGGACCAAGAATTAGATATT  
AATCGTTTAAGTGATTATGATGTCGATCACATTGTTCCACAAGTTTCCTT  
AAAGACGATTCAATAGACAATAAGGTCTTAACGCGTTCTGATAAAAATCG  
TGGTAAATCGGATAACGTTCCAAGTGAAGAAGTAGTCAAAAAGATGAAA  
AACTATTGGAGACA ACTTCTAAACGCCAAGTTAATCACTCAACGTAAGTT  
TGATAATTTAACGAAAGCTGAACGTGGAGGTTTGAGTGA ACTTGATAAAG  
CTGGTTTTATCAAACGCCAATTGGTTGAAACTCGCCAAATCACTAAGCAT  
GTGGCACAAATTTTGGATAGTCGCATGAATACTAAATACGATGAAAATGA  
TAACTTATTCGAGAGGTTAAAGTGATTACCTTAAAATCTAAATTAGTTTC  
TGACTTCCGAAAAGATTTCCAATTCTATAAAGTACGTGAGATTAACAATTA  
CCATCATGCCATGATGCGTATCTAAATGCCGTCGTTGGA ACTGCTTTGAT  
TAAGAAATATCCAAA ACTTGAATCGGAGTTTGTCTATGGTGATTATAAAG  
TTTATGATGTTTCGTA AAAATGATTGCTAAGTCTGAGCAAGAAATAGGCAA  
GCAACCGCAA AATATTTCTTTTACTCTAATATCATGAACTTCTTCAAACA  
GAAATTACACTTGCAAATGGAGAGATTCGCAAACGCCCTCTAATCGAAAC  
TAATGGGGAA ACTGGAGAAATTGTCTGGGATAAAGGGCGAGATTTTGCCA  
CAGTGCGCAAAGTATTGTCCATGCCCAAGTCAATATTGTCAAGAAAACA  
GAAGTACAGACAGGCGGATTCTCAAAGGAGTCAATTTTACCAA AAAAGAA

ATTCGGACAAGCTTATTGCTCGTAAAAAAGACTGGGATCCAAAAAATAT  
GGTGGTTTTGATAGTCCAACGGTAGCTTATTCAGTCCTAGTGGTTGCTAAG  
GTGGAAAAGGGAAATCGAAGAAGTTAAAATCCGTTAAAGAGTTACTAG  
GGATCACAATTATGGAAAGAAGTTCCTTTGAAAAAATCCGATTGACTTT  
TTAGAAGCTAAAGGATATAAGGAAGTTAAAAAAGACTTAATCATTAACT  
ACCTAAATATAGTCTTTTTGAGTTAGAAAACGGTCGTAAACGGATGCTGG  
CTAGTGCCGGAGAATTACAAAAAGGAAATGAGCTGGCTCTGCCAAGCAA  
ATATGTGAATTTTTTATATTTAGCTAGTCATTATGAAAAGTTGAAGGGTAG  
TCCAGAAGATAACGAACAAAAACAATTGTTTGTGGAGCAGCATAAGCATT  
ATTTAGATGAGATTATTGAGCAAATCAGTGAATTTTCTAAGCGTGTTATTT  
TAGCAGATGCCAATTTAGATAAAGTTCTTAGTGCATATAACAAACATAGA  
GACAAACCAATACGTGAACAAGCAGAAAATATTATTCATTTATTTACGTT  
GACGAATCTTGGAGCTCCCGCTGCTTTTAAATATTTTGATACAACAATTGA  
TCGTAAACGATATACGTCTACAAAAGAAGTTTTAGATGCCACTCTTATCCA  
TCAATCCATCACTGGTCTTTATGAAACACGCATTGATTTGAGTCAGCTAGG  
AGGTGACTAACTCGAGTAAGGATCTCCAGGCATCAAATAAAACGAAAGG  
CTCAGTCGAAAGACTGGGCCTTTCGTTTTATCTGTTGTTTGTGCGGTGAACG  
CTCTCTACTAGAGTCACACTGGCTCACCTTCGGGTGGGCCTTCTGCGTTT  
ATACCTAGGGATATATTCCGCTTCCTCGCTCACTGCAGCGTCATCACGAAA  
GAACAAGACTTTTCACCATATAAACTGCTGATCGTCCCGATGCTGTATTTA  
ATCAGCGAGGACACCGTTTTCCCGTTTTAAAAGCGTTTACGGCTGACGGCGG  
CACCTTAGTCATGACGTATATCAGCGGGGTTGTGAATGAGCATGACTTAA  
CATACACAGGCGGATGGCATCCGGATCTTCAAGCTATATTTGGAGTTGAG  
CCTCTTGAAACGGACACCCTGTATCCGAAGGATCGAAACGCTGTCAGCTA  
CCGCAGCCAAATATATGAAATGAAGGATTATGCAACCGTGATTGATGTAA  
AGACAGCTTCAGTGGAAGCGGTGTATCAAGAAGATTTTTATGCGCGCACG  
CCAGCGGTCACAAGCCATGAGTATCAGCAGGGCAAGGCGTATTTTATCGG  
CGCGCGTTTTGGAGGATCAATTTAGCGTGATTTCTATGAGGGTCTGATCAC  
AGACCTGTCTCTCTCCAGTTTTTCCGGTTCGGCACGGAAAAGGCGTCTC  
CGTACAAGCGAGGCAGGATCAGGACAATGATTATATTTTTGTGCATGAATT  
TCACGGAAGAAAAACAGCTGGTCACGTTTGATCAGAGTGTGAAGGACATA  
ATGACAGGAGACATATTGTCAGGCGACCTGACGATGGAAAAGTATGAAG  
TGAGAATTGTTCGTAAACACACATTAG

pAX-ABE7.10-nCas9-CDA

GTGATGTCAAAGCTTGAAAAACGCACGTAACAAAAGCAAAATTTATGCT  
CCATGGGGGAGACTACAACCCCGATCAGTGGCTGGATCGGCCCGATATTT  
TAGCTGACGATATCAAACCTGATGAAGCTTTCTCATAACGAATACGTTTTCTG  
TCGGCATTGTTTGCATGGAGCGCACTTGAGCCGGAGGAGGGCGTATATCAA  
TTTGAATGGCTGGATGATATTTTTGAGCGGATTCACAGTATAGGCGGCCG  
GGTCATATTAGCAACGCCGAGCGGAGCCCGTCCGGCCTGGCTGTCGCAAA  
CCTATCCGGAAGTTTTGCGCGTCAATGCCTCCCGCGTCAAACAGCTGCAC  
GGCGGAAGGCACAACCACTGCCTCACATCTAAAGTCTACCGAGAAAAAA  
CACGGCACATCAACCGCTTATTAGCAGAACGATACGGACATCACCCGGCG

CTGTTAATGTGGCACATTTCAAACGAATACGGGGGAGATTGCCACTGTGA  
TTTATGCCAGCATGCTTTCCGGGAGTGGCTGAAATCGAAATATGACAACA  
GCCTCAAGACATTGAACCATGCGTGGTGGACCCCTTTTTGGAGCCATACG  
TTCAATGACTGGTCACAAATTGAAAGCCCTTCGCCGATCGGTGAAAATGG  
CTTGCATGGCCTGAATTTAGATTGGCGCCGGTTCGTCACCGATCAAACGAT  
TTCGTTTTATGAAAATGAAATCATTCCGCTGAAAGAATTGACGCCTGATAT  
CCCTATCACAACGAATTTTATGGCTGACACACCGGATTTGATCCCGTATAC  
CGTTCGTATAGCATAATTATACGAAGTTATGCCATAGTGACTGGCGATG  
CTGTCGGAATGGACGACGGCAATAGTTACCCTTATTATCAAGATAAGAAA  
GAAAAGGATTTTTCGCTACGCTCAAATCCTTTAAAAAACACAAAAGACC  
ACATTTTTTAATGTGGTCTTTTATTCTTCAACTAAAGCACCCATTAGTTCAA  
CAAACGAAAATTGGATAAAGTGGGATATTTTTAAAATATATATTTATGTTA  
CAGTAATATTGACTTTTAAAAAAGGATTGATTCTAATGAAGAAAGCAGAC  
AAGTAAGCCTCCTAAATTCACTTTAGATAAAAAATTTAGGAGGCATATCAA  
ATGAACTTTAATAAAATTGATTTAGACAATTGGAAGAGAAAAGAGATATT  
TAATCATTATTTGAACCAACAAACGACTTTTAGTATAACCACAGAAATTG  
ATATTAGTGTTTTATACCGAAACATAAAACAAGAAGGATATAAATTTTAC  
CCTGCATTTATTTTCTTAGTGACAAGGGTGATAAACTCAAATACAGCTTTT  
AGAACTGGTTACAATAGCGACGGAGAGTTAGGTTATTGGGATAAGTTAGA  
GCCACTTTATACAATTTTTGATGGTGTATCTAAAACATTCTCTGGTATTTG  
GACTCCTGTAAAGAATGACTTCAAAGAGTTTTATGATTTATACCTTTCTGA  
TGTAGAGAAATATAATGGTTCGGGGAAATTGTTTCCCAAACACCTATAC  
CTGAAAATGCTTTTTCTTTCTATTATTCCATGGACTTCATTTACTGGGTT  
TAACTTAAATATCAATAATAATAGTAATTACCTTCTACCCATTATTACAGC  
AGGAAAATTCATTAATAAAGGTAATTCAATATATTTACCGCTATCTTTACA  
GGTACATCATTCTGTTTGTGATGGTTATCATGCAGGATTGTTTATGAACTC  
TATTCAGGAATTGTCAGATAGGCCTAATGACTGGCTTTTATAATATGAGAT  
AATGCCGACTGTACTTTTTACAGTCGGTTTTCTAAAACGATACATTAATAG  
GTACGAAAAGCAACTTTTTTTGCGCTTAAAACCAGTCATACCAATAAAT  
AACTTCGTATAGCATAATTATACGAACGGTATTCAGAACGCTCGGTTGC  
CGCCGGGCGTTTTTTATGCAGCAATGGCAAGAACGTCCCGGGGAGCTCCT  
AACTTATAGGGGTAACACTTAAAAAAGAATCAATAACGATAGAAACCGCT  
CCTAAAGCAGGTGCATTTTTTTCCTAACGAAGAAGGCAATAGTTCACATTT  
ATTGTCTAAATGAGAATGGACTCTAGAAGAACTTCGTTTTTAATCGTATT  
TAAAACAATGGGATGAGATTCAATTATATGATTTCTCAAGATAACAGCTT  
CTATATCAAATGTATTAAGGATATTGGTTAATCCAATTCCGATATAAAAGC  
CAAAGTTTTGAAGTGCATTTAACATTTCTACATCATTTTTTATTTGCGCGTTC  
CACAATCTCTTTTCGAGAAATATTCTTTTCTTTTAGAGAGCGAAGCCAG  
TAACGCTTTTTTCAGAAGCATATAATTCCCAACAGCCTCGATTTCCACAGCT  
GCATTTGGGTCCATTAATACTATCGTCATATGACCCATTTCCCCAGAAA  
ACCTGAACACCTTTATACAATTCGTTGTTAATAACAAGTCCAGTTCCAAT  
TCCGATATTAATACTGATGTAAACGATGTTTTCATAGTTTTTTGTCATACC  
AAATACTTTTTACCGTATGCTCCTGCATTAGCTTCATTTTCAACAAAAC  
CGGAACATTAACACTCACTCTCAATTAAAAACCTGCAAATCTTTGATATTCCA



ATTTAAGTTAGGCATGAAAATAATTTGCTGATGACGATCTACAAGGCCTG  
GAACACAAATTCCTATTCCGACTAGACCATAAGGGGACTCAGGCATATGG  
GTTACAAAACCATGAATAAGTGCAAATAAAATCTCTTTTACTTCACTAGC  
GGAAGAAGTAGACAAGTCAGAAGTCTTCTCGAGAATAATATTTCTTCTA  
AGTCGGTTAGAATTCCGTTAAGATAGTCGACTCCTATATCAATACCAATCG  
AGTAGCCTGCATTCTTATTA AAAACAAGCATTACAGGTCTTCTGCCGCCTC  
TAGATTGCCCTGCCCAATTTCAAAAATAAAATCTTTTTTCAAGCAGTGTAT  
TACTTGAGAGGAGACAGTAGACTTGTTTAATCCTGTAATCTCAGAGAGA  
GTTGCCCTGGAGACAGGGGAGTTCTTCAAAATTTTCATCTAATATTAATTTT  
TGATTCATTTTTTTTTACTAAAGCTTGATCTGCAATTTGAATAATAACCACTC  
CTTTGTTTATCCACCGAACTAAGTTGGTGTTTTTTTGAAGCTTGAATTAGAT  
ATTTAAAAGTATCATATCTAATATTATAACTAAATTTTCTAAAAAAAACAT  
TGAAATAAACATTTATTTTGTATATGATGAGATAAAGTTAGTTTATTGGAT  
AAACAACTAACTCAATTAAGATAGTTGATGGATAAACTTGTTCACTTAA  
ATCAAAGGGGGAAATGACAAATGGTCCAACTAGTGATATCTAAAAATC  
AAAGGGGGAAATGGGATCCATGAGCGAAGTTGAATTCAGCCACGAGTAC  
TGGATGAGACATGCTCTGACACTGGCCAAACGCGCTTGGGACGAAAGAG  
AAGTCCCGGTTCGGAGCTGTTCTGGTCCACAATAATCGCGTCATCGGCGAG  
GGCTGGAATCGCCCGATTGGAAGACATGACCCAACGGCCACGCTGAAAT  
CATGGCTCTTAGACAAGGCGGACTTGTTATGCAGAACTACCGCCTTATTG  
ACGCTACGCTGTACGTACACTGGAACCGTGTGTTATGTGTGCCGGAGCC  
ATGATCCACTCCCGCATTGGCCGCGTCGTTTTTTGGAGCCCGCGATGCCAAA  
ACGGGCGCTGCCGGAAGCCTTATGGATGTCCTTCACCACCCGGGAATGAA  
TCATAGAGTTGAGATCACGGAGGGCATTCTTGCCGACGAATGTGCCGCC  
TTCTGTCCGATTTTTTCCGCATGCGCCGCCAAGAAATCAAGGCCCAAAG  
AAAGCCCAGAGCAGCACGGATTCCGGCGGTTCCAGTGGTGGATCCTCTGG  
ATCTGAGACACCTGGAACGTCTGAATCTGCTACACCAGAATCTTCTGGAG  
GATCTTCTGGTGGCTCCAGCGAAGTCGAGTTCTCCACGAATACTGGATG  
CGCCATGCCCTTACACTTGCCAAACGCGCTCGCGATGAACGCGAAGTCCC  
AGTTGGCGCCGTTCTTGTTCTTAACAACCGCGTCATCGGAGAAGGCTGGA  
ACCGCGCTATCGGACTTCATGATCCGACAGCTCATGCCGAAATTATGGCT  
CTGCGCCAAGGCGGACTTGTCATGCAGAATTACAGACTTATTGATGCCAC  
GCTTTACGTCACGTTTCGAACCGTGCGTCATGTGCGCCGGCGCCATGATCA  
TAGCCGCATCGGCAGAGTTGTCTTCGGCGTCCGCAATGCTAAAACGGGCG  
CCGCCGGCTCCCTTATGGACGTCCTTCATTACCCGGGCATGAATCACCGCG  
TTGAAATCACAGAAGGCATTCTGGCCGATGAGTGCGCCGCTCTGCTGTGC  
TACTTCTTCAGAATGCCGAGACAAGTCTTCAACGCCCAGAAGAAAGCCCA  
AAGCAGCACAGACTCTGGAGGATCATCCGGAGGCAGCTCTGGAAGTGAA  
ACACCAGGAACAAGCGAATCAGCTACACCAGAGTCCTCTGGAGGCTCATC  
TGGAGGAAGCGATAAGAAATACTCAATAGGCTTAGCTATCGGCACAAATA  
GCGTCGGATGGGCGGTGATCACTGATGAATATAAGGTTCCGTCTAAAAAG  
TTCAAGGTTCTGGGAAATACAGACCGCCACAGTATCAAAAAAATCTTAT  
AGGGGCTCTTTTATTTGACAGTGGAGAGACAGCGGAAGCGACTCGTCTCA  
AACGGACAGCTCGTAGAAGGTATACACGTCGGAAGAATCGTATTTGTTAT

CTACAGGAGATTTTTTCAAATGAGATGGCGAAAGTAGATGATAGTTTCTTT  
CATCGACTTGAAGAGTCTTTTTTGGTGGAAAGAAGACAAGAAGCATGAACG  
TCATCCTATTTTTGGAAATATAGTAGATGAAGTTGCTTATCATGAGAAATA  
TCCAACATCTATCATCTGCGAAAAAAATTGGTAGATTCTACTGATAAAG  
CGGATTTGCGCTTAATCTATTTGGCCTTAGCGCATATGATTAAGTTTCGTG  
GTCATTTTTTGATTGAGGGAGATTTAAATCCTGATAATAGTGATGTGGACA  
AACTATTTATCCAGTTGGTACAAACCTACAATCAATTATTTGAAGAAAAC  
CCTATTAACGCAAGTGGAGTAGATGCTAAAGCGATTCTTTCTGCACGATT  
GAGTAAATCAAGACGATTAGAAAATCTCATTGCTCAGCTCCCCGGTGAGA  
AGAAAAATGGCTTATTTGGGAATCTCATTGCTTTGTCATTGGGTTTGACCC  
CTAATTTTAAATCAAATTTTGATTTGGCAGAAGATGCTAAATTACAGCTTT  
CAAAAGATACTTACGATGATGATTTAGATAATTTATTGGCGCAAATTGGA  
GATCAATATGCTGATTTGTTTTTGGCAGCTAAGAATTTATCAGATGCTATT  
TTACTTTTCAAGATATCCTAAGAGTAAATACTGAAATAACTAAGGCTCCCCTA  
TCAGCTTCAATGATTAACGCTACGATGAACATCATCAAGACTTGACTCTT  
TTAAAAGCTTTAGTTTCGACAACAACCTCCAGAAAAGTATAAAGAAATCTT  
TTTTGATCAATCAAAAACGGATATGCAGGTTATATTGATGGGGGAGCTA  
GCCAAGAAGAATTTTATAAATTTATCAAACCAATTTTAGAAAAAATGGAT  
GGTACTGAGGAATTATTGGTGAAACTAAATCGTGAAGATTTGCTGCGCAA  
GCAACGGACCTTTGACAACGGCTCTATTCCCCATCAAATTCACTTGGGTGA  
GCTGCATGCTATTTTGAGAAGACAAGAAGACTTTTATCCATTTTTAAAAGA  
CAATCGTGAGAAGATTGAAAAAATCTTGACTTTTCGAATTCCTTATTATGT  
TGGTCCATTGGCGCGTGGCAATAGTCGTTTTGCATGGATGACTCGGAAGT  
CTGAAGAAACAATTACCCCATGGAATTTTGAAGAAGTTGTCGATAAAGGT  
GCTTCAGCTCAATCATTTATTGAACGCATGACAACTTTGATAAAAATCTT  
CCAAATGAAAAAGTACTACCAAAACATAGTTTGCTTTATGAGTATTTTACG  
GTTTATAACGAATTGACAAAGGTCAAATATGTTACTGAAGGAATGCGAAA  
ACCAGCATTTCTTTCAGGTGAACAGAAGAAAGCCATTGTTGATTTACTCTT  
CAAAACAAATCGAAAAGTAACCGTTAAGCAATTAAGAAGATTATTTCA  
AAAAAATAGAATGTTTTGATAGTGTGAAATTCAGGAGTTGAAGATAGA  
TTAATGCTTCATTAGGTACCTACCATGATTTGCTAAAAATTATTAAGAT  
AAAGATTTTTTGGATAATGAAGAAAATGAAGATATCTTAGAGGATATTGT  
TTAACATTGACCTTATTTGAAGATAGGGAGATGATTGAGGAAAGACTTA  
AACATATGCTCACCTCTTTGATGATAAGGTGATGAAACAGCTTAAACGT  
CGCCGTTATACTGGTTGGGGACGTTTGTCTCGAAAATTGATTAATGGTATT  
AGGGATAAGCAATCTGGCAAAACAATATTAGATTTTTTTGAAATCAGATGG  
TTTTGCCAATCGCAATTTTATGCAGCTGATCCATGATGATAGTTTGACATT  
TAAAGAAGACATTCAAAAAGCACAAGTGTCTGGACAAGGCGATAGTTTAC  
ATGAACATATTGCAAATTTAGCTGGTAGCCCTGCTATTA AAAAAGGTATTT  
TACAGACTGTAAAAGTTGTTGATGAATTGGTCAAAGTAATGGGGCGGCAT  
AAGCCAGAAAATATCGTTATTGAAATGGCACGTGAAAATCAGACAACCTCA  
AAAGGGCCAGAAAAATTCGCGAGAGCGTATGAAACGAATCGAAGAAGGT  
ATCAAAGAATTAGGAAGTCAGATTCTTAAAGAGCATCCTGTTGAAAATAC  
TCAATTGCAAATGAAAAGCTCTATCTCTATTATCTCCAAAATGGAAGAG

ACATGTATGTGGACCAAGAATTAGATATTAATCGTTTAAGTGATTATGATG  
TCGATCACATTGTTCCACAAAGTTTCCTTAAAGACGATTCAATAGACAATA  
AGGTCTTAACGCGTTCTGATAAAAATCGTGGTAAATCGGATAACGTTCCA  
AGTGAAGAAGTAGTCAAAAAGATGAAAACTATTGGAGACAACCTTCTAA  
ACGCCAAGTTAATCACTCAACGTAAGTTTGATAATTTAACGAAAGCTGAA  
CGTGGAGGTTTGAGTGAACCTTGATAAAGCTGGTTTTATCAAACGCCAATT  
GGTTGAAACTCGCCAAATCACTAAGCATGTGGCACAATTTTGGATAGTC  
GCATGAATACTAAATACGATGAAAATGATAAACTTATTCGAGAGGTTAAA  
GTGATTACCTTAAAATCTAAATTAGTTTCTGACTTCCGAAAAGATTTCCAA  
TTCTATAAAGTACGTGAGATTAACAATTACCATCATGCCCATGATGCGTAT  
CTAAATGCCGTCGTTGGAACCTGCTTTGATTAAGAAATATCCAAAACCTGA  
ATCGGAGTTTGTCTATGGTGATTATAAAGTTTATGATGTTTCGTAAAATGAT  
TGCTAAGTCTGAGCAAGAAATAGGCCAAAGCAACCGCAAATATTTCTTTT  
ACTCTAATATCATGAACTTCTTCAAACAGAAATTACACTTGCAAATGGA  
GAGATTCGCAAACGCCCTCTAATCGAACTAATGGGGAAACTGGAGAAAT  
TGTCTGGGATAAAGGGCGAGATTTTGCCACAGTGCGCAAAGTATTGTCCA  
TGCCCCAAGTCAATATTGTCAAGAAAACAGAAGTACAGACAGGCGGATTC  
TCCAAGGAGTCAATTTTACCAAAAAGAAATTCGGACAAGCTTATTGCTCG  
TAAAAAAGACTGGGATCCAAAAAATATGGTGGTTTTGATAGTCCAACGG  
TAGCTTATTCAGTCCTAGTGGTTGCTAAGGTGGAAAAAGGGAAATCGAAG  
AAGTTAAAATCCGTTAAAGAGTTACTAGGGATCACAATTATGGAAAGAAG  
TTCCTTTGAAAAAATCCGATTGACTTTTTAGAAAGCTAAAGGATATAAGG  
AAGTTAAAAAAGACTTAATCATTAAACTACCTAAATATAGTCTTTTTGAGT  
TAGAAAACGGTCGTAAACGGATGCTGGCTAGTGCCGGAGAATTACAAAA  
AGGAAATGAGCTGGCTCTGCCAAGCAAATATGTGAATTTTTTATATTTAGC  
TAGTCATTATGAAAAGTTGAAGGGTAGTCCAGAAGATAACGAACAAAA  
CAATTGTTTGTGGAGCAGCATAAGCATTATTTAGATGAGATTATTGAGCA  
AATCAGTGAATTTTCTAAGCGTGTTATTTTAGCAGATGCCAATTTAGATAA  
AGTTCTTAGTGATATAACAAACATAGAGACAAACCAATACGTGAACAAG  
CAGAAAATATTATTCATTTATTTACGTTGACGAATCTTGGAGCTCCCGCTG  
CTTTTAAATATTTTGATACAACAATTGATCGTAAACGATATACGTCTACAA  
AAGAAGTTTTAGATGCCACTCTTATCCATCAATCCATCACTGGTCTTTATG  
AAACACGCATTGATTTGAGTCAGCTAGGAGGTGACGGTTCTGCAGCTTCT  
AGAATGACAGATGCCGAATACGTTTCGCATCCACGAGAAGCTGGATATCTA  
CACGTTTAAAAGCAGTTTTTTAACAATAAGAAGAGCGTCTCCACCGCT  
GCTATGTTCTTTTCGAACTGAAACGCAGAGGCGAAAGACGCGCTTGCTTC  
TGGGGATATGCCGTTAACAAACCGCAGTCCGGCACGGAACGCGGCATTCA  
CGCCGAGATCTTCAGCATCCGCAAGGTTGAGGAGTATCTTCGCGATAACC  
CGGGCCAGTTTACGATCAACTGGTACAGCAGCTGGAGCCCGTGTGCCGAT  
TGCGCCGAAAAGATTCTTGAGTGGTACAACCAAGAAGCTTCGCGGCAATGG  
CCACACGCTGAAAATCTGGGCTTGCAAGCTGTACTACGAGAAGAACGCC  
GCAATCAGATCGGACTTTGGAATCTTCGCGATAATGGCGTTGGACTTAAC  
GTCATGGTCTCCGAACACTACCAGTGCTGCCGCAAGATCTTCATCCAGTCC  
TCCCACAACCAGCTTAACGAAAACCGCTGGCTGGAGAAGACACTGAAAC

GCGCTGAAAAGCGCCGCTCCGAGCTGAGCATCATGATCCAAGTTAAGATT  
CTTCATACGACGAAGAGCCCGGCGTCTAACTCGAGTAAGGATCTCCAGG  
CATCAAATAAAACGAAAGGCTCAGTCGAAAGACTGGGCCTTTCGTTTTAT  
CTGTTGTTTGTGCGGTGAACGCTCTCTACTAGAGTCACACTGGCTCACCTTC  
GGGTGGGCCTTCTGCGTTTATACCTAGGGATATATTCCGCTTCCTCGCTC  
ACTGCAGCGTCATCACGAAAGAACAAGACTTTTCACCATATAAACTGCTG  
ATCGTCCCGATGCTGTATTTAATCAGCGAGGACACCGTTTCCCGTTTAAAA  
GCGTTTACGGCTGACGGCGGCACCTTAGTCATGACGTATATCAGCGGGGT  
TGTGAATGAGCATGACTTAACATACACAGGCGGATGGCATCCGGATCTTC  
AAGCTATATTTGGAGTTGAGCCTCTTGAAACGGACACCCTGTATCCGAAG  
GATCGAAACGCTGTCAGCTACCGCAGCCAAATATATGAAATGAAGGATTA  
TGCAACCGTGATTGATGTAAAGACAGCTTCAGTGGAAGCGGTGTATCAAG  
AAGATTTTTATGCGCGCACGCCAGCGGTCACAAGCCATGAGTATCAGCAG  
GGCAAGGCGTATTTTATCGGCGCGCGTTTGGAGGATCAATTCAGCGTGA  
TTTCTATGAGGGTCTGATCACAGACCTGTCTCTCTCTCCAGTTTTTCCGGTT  
CGGCACGGAAAAGGCGTCTCCGTACAAGCGAGGCAGGATCAGGACAATG  
ATTATATTTTTGTCATGAATTCACGGAAGAAAAACAGCTGGTCACGTTTG  
ATCAGAGTGTGAAGGACATAATGACAGGAGACATATTGTCAGGCGACCTG  
ACGATGGAAAAGTATGAAGTGAGAATTGTCGTAAACACACATTAG

pAX-ABE8e-CDA-nCas9

GTGATGTCAAAGCTTGAAAAACGCACGTAACAAAAGCAAAATTTATGCT  
CCATGGGGGAGACTACAACCCCGATCAGTGGCTGGATCGGCCCCGATATTT  
TAGCTGACGATATCAAACCTGATGAAGCTTCTCATAACGAATACGTTTTCTG  
TCGGCATTTTTGCATGGAGCGCACTTGAGCCGGAGGAGGGCGTATATCAA  
TTTGAATGGCTGGATGATATTTTTGAGCGGATTCACAGTATAGGCGGCCG  
GGTCATATTAGCAACGCCGAGCGGAGCCCGTCCGGCCTGGCTGTCGCAA  
CCTATCCGGAAGTTTTGCGCGTCAATGCCTCCCGCGTCAAACAGCTGCAC  
GGCGGAAGGCACAACCACTGCCTCACATCTAAAGTCTACCGAGAAAAAA  
CACGGCACATCAACCGCTTATTAGCAGAACGATACGGACATCACCCGGCG  
CTGTTAATGTGGCACATTTCAAACGAATACGGGGGAGATTGCCACTGTGA  
TTTATGCCAGCATGCTTTCGGGAGTGGCTGAAATCGAAATATGACAACA  
GCCTCAAGACATTGAACCATGCGTGGTGGACCCCTTTTTGGAGCCATACG  
TTCAATGACTGGTCACAAATTGAAAGCCCTTCGCCGATCGGTGAAAATGG  
CTTGATGGCCTGAATTTAGATTGGCGCCGGTTCGTCACCGATCAAACGAT  
TTCGTTTTATGAAAATGAAATCATTCCGCTGAAAGAATTGACGCCTGATAT  
CCCTATCACAACGAATTTTATGGCTGACACACCGGATTTGATCCCGTATAC  
CGTTCGTATAGCATAATTATACGAAGTTATGCCATAGTGACTGGCGATG  
CTGTCGGAATGGACGACGGCAATAGTTACCCTTATTATCAAGATAAGAAA  
GAAAAGGATTTTTCGCTACGCTCAAATCCTTTAAAAAAACACAAAAGACC  
ACATTTTTTAATGTGGTCTTTTATTCTTCAACTAAAGCACCCATTAGTTCAA  
CAAACGAAAATTGGATAAAGTGGGATATTTTTAAATATATATTTATGTTA  
CAGTAATATTGACTTTTTAAAAAAGGATTGATTCTAATGAAGAAAGCAGAC  
AAGTAAGCCTCCTAAATTCACCTTTAGATAAAAAATTTAGGAGGCATATCAA

ATGAACTTTAATAAAAATTGATTTAGACAATTGGAAGAGAAAAGAGATATT  
TAATCATTATTTGAACCAACAAACGACTTTTAGTATAACCACAGAAATTG  
ATATTAGTGTTTTATACCGAAACATAAAAACAAGAAGGATATAAATTTTAC  
CCTGCATTTATTTTCTTAGTGACAAGGGTGATAAACTCAAATACAGCTTTT  
AGAACTGGTTACAATAGCGACGGAGAGTTAGGTTATTGGGATAAGTTAGA  
GCCACTTTATACAATTTTTGATGGTGTATCTAAAACATTCTCTGGTATTTG  
GACTCCTGTAAAGAATGACTTCAAAGAGTTTTATGATTTATACCTTTCTGA  
TGTAGAGAAATATAATGGTTCGGGGAAATTGTTTCCCAAACACCTATAC  
CTGAAAATGCTTTTTCTCTTTCTATTATTCCATGGACTTCATTTACTGGGT  
TAACTTAAATATCAATAATAATAGTAATTACCTTCTACCCATTATTACAGC  
AGGAAAATTCATTAATAAAGGTAATTCAATATATTTACCGCTATCTTTACA  
GGTACATCATTCTGTTTGTGATGGTTATCATGCAGGATTGTTTATGAACTC  
TATTCAGGAATTGTCAGATAGGCCTAATGACTGGCTTTTATAATATGAGAT  
AATGCCGACTGTACTTTTTACAGTCGGTTTTCTAAAACGATACATTAATAG  
GTACGAAAAGCAACTTTTTTTGCGCTTAAAACCAGTCATACCAATAAAT  
AACTTCGTATAGCATACATTATACGAACGGTATTCAGAACGCTCGGTTGC  
CGCCGGGCGTTTTTTATGCAGCAATGGCAAGAACGTCCCGGGGAGCTCCT  
AACTTATAGGGGTAACTTAAAAAAGAATCAATAACGATAGAAACCGCT  
CCTAAAGCAGGTGCATTTTTTCTAACGAAGAAGGCAATAGTTCACATTT  
ATTGTCTAAATGAGAATGGACTCTAGAAGAACTTCGTTTTTAATCGTATT  
TAAAACAATGGGATGAGATTCAATTATATGATTTCTCAAGATAACAGCTT  
CTATATCAAATGTATTAAGGATATTGGTTAATCCAATTCCGATATAAAAGC  
CAAAGTTTTGAAGTGCATTTAACATTTCTACATCATTTTTTATTTGCGCGTTC  
CACAATCTCTTTTCGAGAAATATTCTTTTCTTTTAGAGAGCGAAGCCAG  
TAACGCTTTTTCAGAAGCATATAATTCCCAACAGCCTCGATTTCCACAGCT  
GCATTTGGGTCCATTAATACTATCGTCATATGACCCATTTCCCCAGAAAA  
ACCCTGAACACCTTTATACAATTCGTTGTTAATAACAAGTCCAGTTCCAAT  
TCCGATATTAATACTGATGTAAACGATGTTTTTCATAGTTTTTTGTCATACC  
AAATACTTTTTACCGTATGCTCCTGCATTAGCTTCATTTTCAACAAAAAC  
CGGAACATTAAACTCACTCTCAATTAAAAACCTGCAAATCTTTGATATTCCA  
ATTTAAGTTAGGCATGAAAATAATTTGCTGATGACGATCTACAAGGCCTG  
GAACACAAATTCCTATTCCGACTAGACCATAAGGGGACTCAGGCATATGG  
GTTACAAAACCATGAATAAGTGCAAATAAAATCTCTTTTACTTCACTAGC  
GGAAGAACTAGACAAGTCAGAAGTCTTCTCGAGAATAATATTTCTTCTA  
AGTCGGTTAGAATTCCGTTAAGATAGTCGACTCCTATATCAATACCAATCG  
AGTAGCCTGCATTCTTATTAAAAACAAGCATTACAGGTCTTCTGCCGCCTC  
TAGATTGCCCTGCCCAATTTCAAAAATAAAATCTTTTTCAAGCAGTGTAT  
TACTTGAGAGGAGACAGTAGACTTGTTTAATCCTGTAATCTCAGAGAGA  
GTTGCCCTGGAGACAGGGGAGTTCTTCAAATTTTCATCTAATATTAATTTT  
TGATTCATTTTTTTTACTAAAGCTTGATCTGCAATTTGAATAATAACCACTC  
CTTTGTTTATCCACCGAACTAAGTTGGTGTTTTTTTGAAGCTTGAATTAGAT  
ATTTAAAAGTATCATATCTAATATTATAACTAAATTTTCTAAAAAAAACAT  
TGAAATAAACATTTATTTTGTATATGATGAGATAAAGTTAGTTTATTGGAT  
AAACAACTAACTCAATTAAGATAGTTGATGGATAAACTTGTTCACTTAA

ATCAAAGGGGGAAATGACAAATGGTCCAAACTAGTGATATCTAAAAATC  
AAAGGGGGAAATGGGATCCATGTCAGAAGTTGAATTTTCACATGAATATT  
GGATGAGACATGCACTGCACTGGCAAAAAGAGCAAGAGATGAAAGAGA  
AGTTCCGGTTGGCGCAGTTCTGGTTCTGAATAATAGAGTTATTGGCGAAG  
GCTGGAATAGAGCAATTGGCCTGCATGATCCGACAGCACATGCAGAAATT  
ATGGCACTGAGACAAGGCGGCCTGGTTATGCAAAATTATAGACTGATTGA  
TGCAACACTGTATGTTACATTTGAACCGTGCCTTATGTGCGCGGGCGCAAT  
GATTCATTCAAGAATTGGCAGAGTTGTTTTTGGCGTTAGAAATTCAAAAA  
GAGGCGCAGCGGGCTCACTGATGAATGTTCTGAATTATCCGGGCATGAAT  
CATAGAGTTGAAATTACAGAAGGCATTCTGGCAGATGAATGCGCAGCACT  
GCTGTGCGATTTTTATAGAATGCCGAGACAAGTTTTTAATGCACAAAAAA  
AAGCACAATCATCAATTAATTCTGGAGGATCATCCGGAGGCAGCTCTGGA  
AGTGAAACACCAGGAACAAGCGAATCAGCTACACCAGAGTCCTCTGGAG  
GCTCATCTGGAGGAAGCACAGATGCCGAATACGTTTCGCATCCACGAGAAG  
CTGGATATCTACACGTTTTAAAAGCAGTTTTTTAACAATAAGAAGAGCGT  
CTCCACCGCTGCTATGTTCTTTTCGAACTGAAACGCAGAGGGCGAAAGAC  
GCGCTTGCTTCTGGGGATATGCCGTTAACAACCGCAGTCCGGCACGGAA  
CGCGGCATTCACGCCGAGATCTTCAGCATCCGCAAGGTTGAGGAGTATCT  
TCGCGATAACCCGGGCCAGTTTACGATCAACTGGTACAGCAGCTGGAGCC  
CGTGTGCCGATTGCGCCGAAAAGATTCTTGAGTGGTACAACCAAGAACTT  
CGCGGCAATGGCCACACGCTGAAAATCTGGGCTTGCAAGCTGTACTACGA  
GAAGAACGCCC GCAATCAGATCGGACTTTGGAATCTTCGCGATAATGGCG  
TTGGACTTAACGTCATGGTCTCCGAACACTACCAGTGCTGCCGCAAGATCT  
TCATCCAGTCCTCCCAACACCAGCTTAACGAAAACCGCTGGCTGGAGAAG  
ACACTGAAACGCGCTGAAAAGCGCCGCTCCGAGCTGAGCATCATGATCCA  
AGTTAAGATTCTTCATACGACGAAGAGCCCGCCGTCTCAGGTTCTGAAA  
CTCCTGGAACCAGTGAGTCTGCAACTCCAGAGTCTATGGATAAGAAATAC  
TCAATAGGCTTAGCTATCGGCACAAATAGCGTCGGATGGGCGGTGATCAC  
TGATGAATATAAGGTTCCGTCTAAAAAGTTCAAGGTTCTGGGAAATACAG  
ACCGCCACAGTATCAAAAAAATCTTATAGGGGCTCTTTATTTGACAGT  
GGAGAGACAGCGGAAGCGACTCGTCTCAAACGGACAGCTCGTAGAAGGT  
ATACACGTCGGAAGAATCGTATTTGTTATCTACAGGAGATTTTTTCAAATG  
AGATGGCGAAAGTAGATGATAGTTTCTTTCATCGACTTGAAGAGTCTTTTT  
TGGTGGAGAAGACAAGAAGCATGAACGTCATCCTATTTTTGGAAATATA  
GTAGATGAAGTTGCTTATCATGAGAAATATCCAACACTATCTATCATCTGCGA  
AAAAAATTGGTAGATTCTACTGATAAAGCGGATTTGCGCTTAATCTATTTG  
GCCTTAGCGCATATGATTAAGTTTCGTGGTCATTTTTTGATTGAGGGAGAT  
TTAAATCCTGATAATAGTGATGTGGACAAACTATTTATCCAGTTGGTACAA  
ACCTACAATCAATTATTTGAAGAAAACCCTATTAACGCAAGTGGAGTAGA  
TGCTAAAGCGATTCTTTCTGCACGATTGAGTAAATCAAGACGATTAGAAA  
ATCTCATTGCTCAGCTCCCCGGTGAGAAGAAAAATGGCTTATTTGGGAAT  
CTCATTGCTTTGTCATTGGGTTTGACCCCTAATTTTAAATCAAATTTTGATT  
TGGCAGAAGATGCTAAATTACAGCTTTCAAAGATACTTACGATGATGAT  
TTAGATAATTTATTGGCGCAAATTGGAGATCAATATGCTGATTTGTTTTG

GCAGCTAAGAATTTATCAGATGCTATTTTACTTTTCAGATATCCTAAGAGTA  
AATACTGAAATAACTAAGGCTCCCCTATCAGCTTCAATGATTAACGCTA  
CGATGAACATCATCAAGACTTGACTCTTTTAAAAGCTTTAGTTCGACAACA  
ACTTCCAGAAAAGTATAAAGAAATCTTTTTTGATCAATCAAAAAACGGAT  
ATGCAGGTTATATTGATGGGGGAGCTAGCCAAGAAGAATTTTATAAATTT  
ATCAAACCAATTTTAGAAAAAATGGATGGTACTGAGGAATTATTGGTGAA  
ACTAAATCGTGAAGATTTGCTGCGCAAGCAACGGACCTTTGACAACGGCT  
CTATCCCCATCAAATTCACTTGGGTGAGCTGCATGCTATTTTGAGAAGAC  
AAGAAGACTTTTATCCATTTTTAAAAGACAATCGTGAGAAGATTGAAAAA  
ATCTTGACTTTTCGAATTCCTTATTATGTTGGTCCATTGGCGCGTGGCAAT  
AGTCGTTTTGCATGGATGACTCGGAAGTCTGAAGAAACAATTACCCCATG  
GAATTTTGAAGAAGTTGTCGATAAAGGTGCTTCAGCTCAATCATTATTGA  
ACGCATGACAACTTTGATAAAAATCTTCCAAATGAAAAGTACTACCAA  
AACATAGTTTGCTTTATGAGTATTTTACGGTTTATAACGAATTGACAAAGG  
TCAAATATGTTACTGAAGGAATGCGAAAACCAGCATTTCCTTCAGGTGAA  
CAGAAGAAAGCCATTGTTGATTTACTCTTCAAACAAATCGAAAAGTAAC  
CGTTAAGCAATTAAGAAGATTATTTCAAAAAAATAGAATGTTTTGATA  
GTGTTGAAATTCAGGAGTTGAAGATAGATTTAATGCTTCATTAGGTACCT  
ACCATGATTTGCTAAAAATTATTAAGATAAAGATTTTTTGGATAATGAA  
GAAAATGAAGATATCTTAGAGGATATTGTTTTAACATTGACCTTATTTGAA  
GATAGGGAGATGATTGAGGAAAGACTTAAAACATATGCTCACCTCTTTGA  
TGATAAGGTGATGAAACAGCTTAAACGTCGCCGTTATACTGGTTGGGGAC  
GTTTGTCTCGAAAATTGATTAATGGTATTAGGGATAAGCAATCTGGCAAA  
ACAATATTAGATTTTTTGAATCAGATGGTTTTGCCAATCGCAATTTTATG  
CAGCTGATCCATGATGATAGTTTGACATTTAAAGAAGACATTCAAAAAGC  
ACAAGTGTCTGGACAAGGCGATAGTTTACATGAACATATTGCAAATTTAG  
CTGGTAGCCCTGCTATTA AAAAAGGTATTTTACAGACTGTAAAAGTTGTTG  
ATGAATTGGTCAAAGTAATGGGGCGGCATAAGCCAGAAAATATCGTTATT  
GAAATGGCACGTGAAAATCAGACA ACTCAAAGGGCCAGAAAAATTCGC  
GAGAGCGTATGAAACGAATCGAAGAAGGTATCAAAGAATTAGGAAGTCA  
GATTCTTAAAGAGCATCCTGTTGAAAATACTCAATTGCAAATGAAAAGC  
TCTATCTCTATTATCTCCAAAATGGAAGAGACATGTATGTGGACCAAGAA  
TTAGATATTAATCGTTTAAGTGATTATGATGTCGATCACATTGTTCCACAA  
AGTTTCCTTAAAGACGATTCAATAGACAATAAGGTCTTAACGCGTTCTGAT  
AAAAATCGTGGTAAATCGGATAACGTTCCAAGTGAAGAAGTAGTCAAAA  
AGATGAAAAACTATTGGAGACA ACTTCTAAACGCCAAGTTAATCACTCAA  
CGTAAGTTTGATAATTTAACGAAAGCTGAACGTGGAGGTTTGAGTGAAC  
TGATAAAGCTGGTTTTATCAAACGCCAATTGGTTGAAACTCGCCAAATCA  
CTAAGCATGTGGCACAAATTTTGGATAGTCGCATGAATACTAAATACGAT  
GAAAATGATAAACTTATTCGAGAGGTTAAAGTGATTACCTTAAAATCTAA  
ATTAGTTTCTGACTTCCGAAAAGATTTCCAATTCTATAAAGTACGTGAGAT  
TAACAATTACCATCATGCCCATGATGCGTATCTAAATGCCGTCGTTGGAAC  
TGCTTTGATTAAGAAATATCCAAA ACTTGAATCGGAGTTTGTCTATGGTGA  
TTATAAAGTTTATGATGTTTCGTA AAAATGATTGCTAAGTCTGAGCAAGAAAT

AGGCAAAGCAACCGCAAAATATTTCTTTTACTCTAATATCATGAACTTCTT  
CAAAACAGAAATTACACTTGCAAATGGAGAGATTCGCAAACGCCCTCTAA  
TCGAAACTAATGGGGAAACTGGAGAAATTGTCTGGGATAAAGGGCGAGA  
TTTTGCCACAGTGCACAAAGTATTGTCCATGCCCAAGTCAATATTGTCAA  
GAAAACAGAAGTACAGACAGGCGGATTCTCCAAGGAGTCAATTTTACCAA  
AAAGAAATTCGGACAAGCTTATTGCTCGTAAAAAAGACTGGGATCCAAAA  
AAATATGGTGGTTTTGATAGTCCAACGGTAGCTTATTCAGTCCTAGTGGTT  
GCTAAGGTGGAAAAAGGGAAATCGAAGAAGTTAAAATCCGTTAAAGAGT  
TACTAGGGATCACAATTATGGAAAGAAGTTCCTTTGAAAAAATCCGATT  
GACTTTTTAGAAAGCTAAAGGATATAAGGAAGTTAAAAAAGACTTAATCAT  
TAAACTACCTAAATATAGTCTTTTTGAGTTAGAAAACGGTCGTAAACGGA  
TGCTGGCTAGTGCCGGAGAATTACAAAAAGGAAATGAGCTGGCTCTGCCA  
AGCAAATATGTGAATTTTTTATATTTAGCTAGTCATTATGAAAAGTTGAAG  
GGTAGTCCAGAAGATAACGAACAAAAACAATTGTTTGTGGAGCAGCATA  
AGCATTATTTAGATGAGATTATTGAGCAAATCAGTGAATTTTCTAAGCGTG  
TTATTTTAGCAGATGCCAATTTAGATAAAGTTCTTAGTGCATATAACAAAC  
ATAGAGACAAACCAATACGTGAACAAGCAGAAAATATTATTCATTTATTT  
ACGTTGACGAATCTTGGAGCTCCCGCTGCTTTTAAATATTTTGATACAACA  
ATTGATCGTAAACGATATACGTCTACAAAAGAAGTTTTAGATGCCACTCTT  
ATCCATCAATCCATCACTGGTCTTTATGAAACACGCATTGATTTGAGTCAG  
CTAGGAGGTGACTAACTCGAGTAAGGATCTCCAGGCATCAAATAAAACGA  
AAGGCTCAGTCGAAAGACTGGGCCTTTCGTTTTATCTGTTGTTTGTCCGGT  
AACGCTCTCTACTAGAGTCACACTGGCTCACCTTCGGGTGGGCCTTTCTGC  
GTTTATACCTAGGGATATATTCGCTTCCCTCGCTCACTGCAGCGTCATCAC  
GAAAGAACAAGACTTTTCACCATATAAACTGCTGATCGTCCCGATGCTGT  
ATTTAATCAGCGAGGACACCGTTTCCCGTTTAAAAGCGTTTACGGCTGAC  
GGCGGCACCTTAGTCATGACGTATATCAGCGGGGTTGTGAATGAGCATGA  
CTTAACATACACAGGCGGATGGCATCCGGATCTTCAAGCTATATTTGGAG  
TTGAGCCTCTTGAAACGGACACCCTGTATCCGAAGGATCGAAACGCTGTC  
AGTACCGCAGCCAAATATATGAAATGAAGGATTATGCAACCGTGATTGA  
TGTAAGACAGCTTCAGTGGAAGCGGTGTATCAAGAAGATTTTTATGCGC  
GCACGCCAGCGGTCACAAGCCATGAGTATCAGCAGGGCAAGGCGTATTTT  
ATCGGCGCGCGTTTGGAGGATCAATTTAGCGTGATTTCTATGAGGGTCTG  
ATCACAGACCTGTCTCTCTCCAGTTTTTCCGGTTCGGCACGGAAAAGGC  
GTCTCCGTACAAGCGAGGCAGGATCAGGACAATGATTATATTTTTGTCAT  
GAATTTACGGAAGAAAAACAGCTGGTCACGTTTGATCAGAGTGTGAAGG  
ACATAATGACAGGAGACATATTGTCAGGCGACCTGACGATGGAAAAGTAT  
GAAGTGAGAATTGTCGTAAACACACATTAG

pAX-CDA-ABE8e-nCas9

GTGATGTCAAAGCTTGAAAAAACGCACGTAACAAAAGCAAAATTTATGCT  
CCATGGGGGAGACTACAACCCCGATCAGTGGCTGGATCGGCCCGATATTT  
TAGCTGACGATATCAAACCTGATGAAGCTTTCTCATAACGAATACGTTTTCTG  
TCGGCATTTTTTGCATGGAGCGCACTTGAGCCGGAGGAGGGCGTATATCAA



TTTGAATGGCTGGATGATATTTTTGAGCGGATTCACAGTATAGGCGGCCG  
GGTCATATTAGCAACGCCGAGCGGAGCCCGTCCGGCCTGGCTGTCGCAAA  
CCTATCCGGAAGTTTTGCGCGTCAATGCCTCCC GCGTCAAACAGCTGCAC  
GGCGGAAGGCACAACCACTGCCTCACATCTAAAGTCTACCGAGAAAAAA  
CACGGCACATCAACCGCTTATTAGCAGAACGATACGGACATCACCCGGCG  
CTGTTAATGTGGCACATTTCAAACGAATACGGGGGAGATTGCCACTGTGA  
TTTATGCCAGCATGCTTTCCGGGAGTGGCTGAAATCGAAATATGACAACA  
GCCTCAAGACATTGAACCATGCGTGGTGGACCCCTTTTTGGAGCCATACG  
TTCAATGACTGGTCACAAATTGAAAGCCCTTCGCCGATCGGTGAAAATGG  
CTTGCATGGCCTGAATTTAGATTGGCGCCGGTTCGTCACCGATCAAACGAT  
TTCGTTTTATGAAAATGAAATCATTCCGCTGAAAGAATTGACGCCTGATAT  
CCCTATCACAACGAATTTTATGGCTGACACACCGGATTTGATCCCGTATAC  
CGTTCGTATAGCATAACATTATACGAAGTTATGCCATAGTGACTGGCGATG  
CTGTCGGAATGGACGACGGCAATAGTTACCCTTATTATCAAGATAAGAAA  
GAAAAGGATTTTTCGCTACGCTCAAATCCTTTAAAAAACACAAAAGACC  
ACATTTTTAATGTGGTCTTTTATTCTTCAACTAAAGCACCCATTAGTTCAA  
CAAACGAAAATTGGATAAAGTGGGATATTTTTAAATATATATTTATGTTA  
CAGTAATATTGACTTTTAAAAAAGGATTGATTCTAATGAAGAAAGCAGAC  
AAGTAAGCCTCCTAAATTCATTTAGATAAAAATTTAGGAGGCATATCAA  
ATGAACTTAATAAAATTGATTTAGACAATTGGAAGAGAAAAGAGATATT  
TAATCATTATTTGAACCAACAAACGACTTTTAGTATAACCACAGAAATTG  
ATATTAGTGTTTTATACCGAAACATAAAACAAGAAGGATATAAATTTTAC  
CCTGCATTTATTTCTTAGTGACAAGGGTGATAAACTCAAATACAGCTTTT  
AGAACTGGTTACAATAGCGACGGAGAGTTAGGTTATTGGGATAAGTTAGA  
GCCACTTTATACAATTTTTGATGGTGTATCTAAAACATTCTCTGGTATTTG  
GACTCCTGTAAAGAATGACTTCAAAGAGTTTTATGATTTATACCTTTCTGA  
TGTAGAGAAATATAATGGTTCGGGGAAATTGTTTCCCAAACACCTATAC  
CTGAAAATGCTTTTTCTCTTTCTATTATTCCATGGACTTCATTTACTGGGT  
TAACTTAAATATCAATAATAATAGTAATTACCTTCTACCCATTATTACAGC  
AGGAAAATTCATTAATAAAGGTAATTCAATATATTTACCGCTATCTTTACA  
GGTACATCATTCTGTTTGTGATGGTTATCATGCAGGATTGTTTATGAACTC  
TATTCAGGAATTGTCAGATAGGCCTAATGACTGGCTTTTATAATATGAGAT  
AATGCCGACTGTACTTTTTACAGTCGGTTTTCTAAAACGATACATTAATAG  
GTACGAAAAAGCAACTTTTTTTGCGCTTAAAACCAGTCATACCAATAAAT  
AACTTCGTATAGCATAACATTATACGAACGGTATTCAGAACGCTCGGTTCG  
CGCCGGGCGTTTTTTATGCAGCAATGGCAAGAACGTCCCGGGGAGCTCCT  
AACTTATAGGGGTAACACTTAAAAAAGAATCAATAACGATAGAAACCGCT  
CCTAAAGCAGGTGCATTTTTTCTAACGAAGAAGGCAATAGTTCACATTT  
ATTGTCTAAATGAGAATGGACTCTAGAAGAACTTCGTTTTTAATCGTATT  
TAAAACAATGGGATGAGATTCAATTATATGATTTCTCAAGATAACAGCTT  
CTATATCAAATGTATTAAGGATATTGGTTAATCCAATTCCGATATAAAAGC  
CAAAGTTTTGAAGTGCATTTAACATTTCTACATCATTTTTATTTGCGCGTTC  
CACAATCTCTTTTCGAGAAATATTCTTTCTTTTAGAGAGCGAAGCCAG  
TAACGCTTTTTTCAGAAGCATATAATTCCCAACAGCCTCGATTTCCACAGCT

GCATTTGGGTCCATTAAAATCTATCGTCATATGACCCATTTCCCCAGAAAA  
ACCCTGAACACCTTTATAACAATTCGTTGTTAATAACAAGTCCAGTTCCAAT  
TCCGATATTAATACTGATGTAAACGATGTTTTCATAGTTTTTTGTCATACC  
AAATACTTTTTACCGTATGCTCCTGCATTAGCTTCATTTTCAACAAAAAC  
CGGAACATTAACTCACTCTCAATTA AAAACTGCAAATCTTTGATATTCCA  
ATTTAAGTTAGGCATGAAAATAATTTGCTGATGACGATCTACAAGGCCTG  
GAACACAAATTCCTATTCCGACTAGACCATAAGGGGACTCAGGCATATGG  
GTTACAAAACCATGAATAAGTGCAAATAAAATCTCTTTTACTTCACTAGC  
GGAAGAAGTACAGCAAGTCAGAAGTCTTCTCGAGAATAATATTCCTTCTA  
AGTCGGTTAGAATTCGTTAAGATAGTCGACTCCTATATCAATACCAATCG  
AGTAGCCTGCATTCTTATTA AAAACAAGCATTACAGGTCTTCTGCCGCCTC  
TAGATTGCCCTGCCCAATTTCAAAAATAAAATCTTTTTCAAGCAGTGTAT  
TACTTGAGAGGAGACAGTAGACTTGTTTAATCCTGTAATCTCAGAGAGA  
GTTGCCCTGGAGACAGGGGAGTTCTTCAAAATTTCACTAATATTAATTTT  
TGATTCATTTTTTTTTACTAAAGCTTGATCTGCAATTTGAATAATAACCACTC  
CTTTGTTTATCCACCGAACTAAGTTGGTGTTTTTTTGAAGCTTGAATTAGAT  
ATTTAAAAGTATCATATCTAATATTATAACTAAATTTTCTAAAAAAAACAT  
TGAAATAAACATTTATTTTGTATATGATGAGATAAAGTTAGTTTATTGGAT  
AAACAACTAACTCAATTAAGATAGTTGATGGATAAACTTGTTCACTTAA  
ATCAAAGGGGGAAATGACAAATGGTCCAACTAGTGATATCTAAAAATC  
AAAGGGGGAAATGGGATCCATGACAGATGCCGAATACGTTTCGCATCCAC  
GAGAAGCTGGATATCTACACGTTTAAAAGCAGTTTTTTAACAATAAGAA  
GAGCGTCTCCACCGCTGCTATGTTCTTTTCGAACTGAAACGCAGAGGCG  
AAAGACGCGCTTGCTTCTGGGGATATGCCGTTAACAACCGCAGTCCGGC  
ACGGAACGCGGCATTCACGCCGAGATCTTCAGCATCCGCAAGGTTGAGGA  
GTATCTTCGCGATAACCCGGGCCAGTTTACGATCAACTGGTACAGCAGCT  
GGAGCCCGTGTGCCGATTGCGCCGAAAAGATTCTTGAGTGGTACAACCAA  
GAACTTCGCGGCAATGGCCACACGCTGAAAATCTGGGCTTGCAAGCTGTA  
CTACGAGAAGAACGCCCGCAATCAGATCGGACTTTGGAATCTTCGCGATA  
ATGGCGTTGGACTTAACGTCATGGTCTCCGAACACTACCAGTGCTGCCGC  
AAGATCTTCATCCAGTCTTCCACAACCAGCTTAACGAAAACCGCTGGCT  
GGAGAAGACACTGAAACGCGCTGAAAAGCGCCGCTCCGAGCTGAGCATC  
ATGATCCAAGTTAAGATTCTTCATACGACGAAGAGCCCGGCCGTCTCAGG  
TTCTGAAACTCCTGGAACCAGTGAGTCTGCAACTCCAGAGTCTTCAGAAG  
TTGAATTTTACATGAATATTGGATGAGACATGCACTGACACTGGCAAAA  
AGAGCAAGAGATGAAAGAGAAGTTCCGGTTGGCGCAGTTCTGGTTCTGAA  
TAATAGAGTTATTGGCGAAGGCTGGAATAGAGCAATTGGCCTGCATGATC  
CGACAGCACATGCAGAAATTATGGCACTGAGACAAGGCGGCCTGGTTATG  
CAAAATTATAGACTGATTGATGCAACACTGTATGTTACATTTGAACCGTGC  
GTTATGTGCGCGGGCGCAATGATTCATTCAAGAATTGGCAGAGTTGTTTTT  
GGCGTTAGAAATTCAAAAAGAGGCGCAGCGGGCTCACTGATGAATGTTCT  
GAATTATCCGGGCATGAATCATAGAGTTGAAATTACAGAAGGCATTCTGG  
CAGATGAATGCGCAGCACTGCTGTGCGATTTTTATAGAATGCCGAGACAA  
GTTTTTAATGCACAAAAAAAAGCACAAATCATCAATTAATTCTGGAGGATC

ATCCGGAGGCAGCTCTGGAAGTGAAACACCAGGAACAAGCGAATCAGCT  
ACACCAGAGTCCTCTGGAGGCTCATCTGGAGGAAGCGATAAGAAATACTC  
AATAGGCTTAGCTATCGGCACAAATAGCGTCGGATGGGCGGTGATCACTG  
ATGAATATAAGGTTCCGTCTAAAAAGTTCAAGGTTCTGGGAAATACAGAC  
CGCCACAGTATCAAAAAAATCTTATAGGGGCTCTTTTATTTGACAGTGG  
AGAGACAGCGGAAGCGACTCGTCTCAAACGGACAGCTCGTAGAAGGTAT  
ACACGTCGGAAGAATCGTATTTGTTATCTACAGGAGATTTTTTCAAATGAG  
ATGGCGAAAGTAGATGATAGTTTCTTTCATCGACTTGAAGAGTCTTTTTTG  
GTGGAAGAAGACAAGAAGCATGAACGTCATCCTATTTTTGGAAATATAGT  
AGATGAAGTTGCTTATCATGAGAAATATCCAACATCTATCATCTGCGAA  
AAAAATTGGTAGATTCTACTGATAAAGCGGATTTGCGCTTAATCTATTTGG  
CCTTAGCGCATATGATTAAGTTTCGTGGTCATTTTTTTGATTGAGGGAGATT  
TAAATCCTGATAATAGTGATGTGGACAACTATTTATCCAGTTGGTACAA  
ACCTACAATCAATTATTTGAAGAAAACCCTATTAACGCAAGTGGAGTAGA  
TGCTAAAGCGATTCTTTCTGCACGATTGAGTAAATCAAGACGATTAGAAA  
ATCTCATTGCTCAGCTCCCCGGTGAGAAGAAAAATGGCTTATTTGGGAAT  
CTCATTGCTTTGTCATTGGGTTTGACCCCTAATTTTAAATCAAATTTTGATT  
TGGCAGAAGATGCTAAATTACAGCTTTCAAAAGATACTTACGATGATGAT  
TTAGATAATTTATTGGCGCAAATTGGAGATCAATATGCTGATTTGTTTTG  
GCAGCTAAGAATTTATCAGATGCTATTTTACTTTCAGATATCCTAAGAGTA  
AATACTGAAATAACTAAGGCTCCCCTATCAGCTTCAATGATTAACGCTA  
CGATGAACATCATCAAGACTTGACTCTTTTAAAAGCTTTAGTTCGACAACA  
ACTTCCAGAAAAGTATAAAGAAATCTTTTTTGATCAATCAAAAAACGGAT  
ATGCAGGTTATATTGATGGGGGAGCTAGCCAAGAAGAATTTTATAAATTT  
ATCAAACCAATTTTAGAAAAAATGGATGGTACTGAGGAATTATTGGTGAA  
ACTAAATCGTGAAGATTTGCTGCGCAAGCAACGGACCTTTGACAACGGCT  
CTATTCCCCATCAAATTCACTTGGGTGAGCTGCATGCTATTTTGAGAAGAC  
AAGAAGACTTTTATCCATTTTTTAAAAGACAATCGTGAGAAGATTGAAAAA  
ATCTTGACTTTTCGAATTCCTTATTATGTTGGTCCATTGGCGCGTGGCAAT  
AGTCGTTTTGCATGGATGACTCGGAAGTCTGAAGAAACAATTACCCCATG  
GAATTTTGAAGAAGTTGTCGATAAAGGTGCTTCAGCTCAATCATTATTGA  
ACGCATGACAACTTTGATAAAAATCTTCAAATGAAAAAGTACTACCAA  
AACATAGTTTGCTTTATGAGTATTTTACGGTTTATAACGAATTGACAAAGG  
TCAAATATGTTACTGAAGGAATGCGAAAACCAGCATTTCCTTTCAGGTGAA  
CAGAAGAAAGCCATTGTTGATTTACTCTTCAAACAAATCGAAAAGTAAC  
CGTTAAGCAATTAAGAAGATTATTTCAAAAAAATAGAATGTTTTGATA  
GTGTTGAAATTTGAGGAGTTGAAGATAGATTTAATGCTTCATTAGGTACCT  
ACCATGATTTGCTAAAAATTATTAAGATAAAGATTTTTTTGGATAATGAA  
GAAAATGAAGATATCTTAGAGGATATTGTTTTAACATTGACCTTATTTGAA  
GATAGGGAGATGATTGAGGAAAGACTTAAACATATGCTCACCTCTTTGA  
TGATAAGGTGATGAAACAGCTTAAACGTCGCCGTTATACTGGTTGGGGAC  
GTTTGTCTCGAAAATTGATTAATGGTATTAGGGATAAGCAATCTGGCAA  
ACAATATTAGATTTTTTGAATCAGATGGTTTTGCCAATCGCAATTTTATG  
CAGCTGATCCATGATGATAGTTTGACATTTAAAGAAGACATTCAAAAAGC

ACAAGTGTCTGGACAAGGCGATAGTTTACATGAACATATTGCAAATTTAG  
CTGGTAGCCCTGCTATTA AAAAAGGTATTTTACAGACTGTAAAAGTTGTTG  
ATGAATTGGTCAAAGTAATGGGGCGGCATAAGCCAGAAAATATCGTTATT  
GAAATGGCACGTGAAAATCAGACA ACTCAAAAAGGGCCAGAAAAATTCGC  
GAGAGCGTATGAAACGAATCGAAGAAGGTATCAAAGAATTAGGAAGTCA  
GATTCTTAAAGAGCATCCTGTTGAAAATACTCAATTGCAAAAATGAAAAGC  
TCTATCTCTATTATCTCCAAAATGGAAGAGACATGTATGTGGACCAAGAA  
TTAGATATTAATCGTTTAAGTGATTATGATGTCGATCACATTGTTCCACAA  
AGTTTCCTTAAAGACGATTCAATAGACAATAAGGTCTTAACGCGTTCTGAT  
AAAAATCGTGGTAAATCGGATAACGTTCCAAGTGAAGAAGTAGTCAAAA  
AGATGAAAAACTATTGGAGACA ACTTCTAAACGCCAAGTTAATCACTCAA  
CGTAAGTTTGATAATTTAACGAAAGCTGAACGTGGAGGTTTGAGTGAAC  
TGATAAAGCTGGTTTTATCAAACGCCAATTGGTTGAAACTCGCCAAATCA  
CTAAGCATGTGGCACAAATTTTGGATAGTCGCATGAATACTAAATACGAT  
GAAAATGATAAACTTATTCGAGAGGTTAAAGTGATTACCTTAAAATCTAA  
ATTAGTTTCTGACTTCCGAAAAGATTTCCAATTCTATAAAGTACGTGAGAT  
TAACAATTACCATCATGCCCATGATGCGTATCTAAATGCCGTCGTTGGAAC  
TGCTTTGATTAAGAAATATCCAAA ACTTGAATCGGAGTTTGTCTATGGTGA  
TTATAAAGTTTATGATGTTTCGTA AAAATGATTGCTAAGTCTGAGCAAGAAAT  
AGGCAAAGCAACCGCAAAAATATTTCTTTTACTCTAATATCATGAACTTCTT  
CAAAACAGAAATTACACTTGCAAATGGAGAGATTCGCAAACGCCCTCTAA  
TCGAAACTAATGGGGAAACTGGAGAAATTGTCTGGGATAAAGGGCGAGA  
TTTTGCCACAGTGC GCAAAGTATTGTCCATGCCCAAGTCAATATTGTCAA  
GAAAACAGAAGTACAGACAGGCGGATTCTCCAAGGAGTCAATTTTACCAA  
AAAGAAATTCGGACAAGCTTATTGCTCGTAAAAAAGACTGGGATCCAAA  
AAATATGGTGGTTTTGATAGTCCAACGGTAGCTTATTCAGTCCTAGTGGTT  
GCTAAGGTGAAAAAAGGGAAATCGAAGAAGTTAAAATCCGTTAAAGAGT  
TACTAGGGATCACAATTATGGAAAGAAGTTCCTTTGAAAAAAATCCGATT  
GACTTTTTAGAAAGCTAAAGGATATAAGGAAGTTAAAAAAGACTTAATCAT  
TAAACTACCTAAATATAGTCTTTTTGAGTTAGAAAACGGTCGTAAACGGA  
TGCTGGCTAGTGCCGGAGAATTACAAA AAGGAAATGAGCTGGCTCTGCCA  
AGCAAATATGTGAATTTTTTATATTTAGCTAGTCATTATGAAAAGTTGAAG  
GGTAGTCCAGAAGATAACGAACAAAAACAATTGTTTGTGGAGCAGCATA  
AGCATTATTTAGATGAGATTATTGAGCAAATCAGTGAATTTTCTAAGCGTG  
TTATTTTAGCAGATGCCAATTTAGATAAAGTTCTTAGTGCATATAACAAAC  
ATAGAGACAAACCAATACGTGAACAAGCAGAAAATATTATTCATTTATTT  
ACGTTGACGAATCTTGGAGCTCCCGCTGCTTTTAAATATTTTGATAACA  
ATTGATCGTAAACGATATACGTCTACAAAAGAAGTTTTAGATGCCACTCTT  
ATCCATCAATCCATCACTGGTCTTTATGAAACACGCATTGATTTGAGTCAG  
CTAGGAGGTGACTA ACTCGAGTAAGGATCTCCAGGCATCAAATAAAACGA  
AAGGCTCAGTCGAAAGACTGGGCCTTTCGTTTTATCTGTTGTTTGTGGTG  
AACGCTCTCTACTAGAGTCACACTGGCTCACCTTCGGGTGGGCCTTTCTGC  
GTTTATACCTAGGGATATATTCGCTTCCCTCGCTCACTGCAGCGTCATCAC  
GAAAGAACAAGACTTTTCACCATATAAACTGCTGATCGTCCCGATGCTGT

ATTTAATCAGCGAGGACACCGTTTCCCGTTTAAAAGCGTTTACGGCTGAC  
GGCGGCACCTTAGTCATGACGTATATCAGCGGGGTTGTGAATGAGCATGA  
CTTAACATACACAGGCGGATGGCATCCGGATCTTCAAGCTATATTTGGAG  
TTGAGCCTCTTGAAACGGACACCCTGTATCCGAAGGATCGAAACGCTGTC  
AGCTACCGCAGCCAAATATATGAAATGAAGGATTATGCAACCGTGATTGA  
TGTAAGACAGCTTCAGTGAAGCGGTGTATCAAGAAGATTTTTATGCGC  
GCACGCCAGCGGTCACAAGCCATGAGTATCAGCAGGGCAAGGCGTATTTT  
ATCGGCGCGCGTTTGGAGGATCAATTCAGCGTGATTTCTATGAGGGTCTG  
ATCACAGACCTGTCTCTCTCTCCAGTTTTTCCGGTTCGGCACGGAAAAGGC  
GTCTCCGTACAAGCGAGGCAGGATCAGGACAATGATTATATTTTTGTTCAT  
GAATTTACGGAAGAAAAACAGCTGGTCACGTTTGATCAGAGTGTGAAGG  
ACATAATGACAGGAGACATATTGTCAGGCGACCTGACGATGGAAAAGTAT  
GAAGTGAGAATTGTCGTAAACACACATTAG

Annotations:

*lacA* upstream homologous arm, chloramphenicol resistance gene, lambda t0 terminator, *Bacillus megaterium* xylR, xylose promoter (Pxyl), RBS, ABE7.10 gene (The highlighted parts indicate linkers), ABE8e gene, PmCDA gene, XTEN linker, GSAASR linker, nCas9 (D10A) gene, *rrnB* T1 terminator, *lacA* downstream homologous arm

## References

- 1 Lu, Z. *et al.* CRISPR-assisted multi-dimensional regulation for fine-tuning gene expression in *Bacillus subtilis*. *Nucleic Acids Res* **47**, e40, doi:10.1093/nar/gkz072 (2019).
- 2 Xu, L., Liu, Y. & Han, R. BEAT: A python program to quantify base editing from sanger sequencing. *CRISPR J* **2**, 223-229, doi:10.1089/crispr.2019.0017 (2019).
